# Supplementary material for: Molecular mechanisms and topological consequences of drastic chromosomal rearrangements of muntjac deer
Source: PubMed Central journal article supplement (PMC8617201; doi:10.1038/s41467-021-27091-0), 2021-11-25
Supplement: 41467_2021_27091_MOESM1_ESM.pdf [file 41467_2021_27091_MOESM1_ESM.pdf]

1  
2  
3  
4  
5  
6  
7  
8  
9  
10  
11  
12  
13  
14  
15  
16  
17  
18  
19  
20  
21  
22  
23  
24  
25  
26  
27  
28

Supplementary Information for

**Molecular mechanisms and topological consequences of drastic chromosomal rearrangements of muntjac deer**

Yuan Yin#, Huizhong Fan#, Botong Zhou#, Yibo Hu#, Guangyi Fan#, Jinhuan Wang#, Fan Zhou#, Wenhui Nie#, Chenzhou Zhang, Lin Liu, Zhenyu Zhong, Wenbo Zhu, Guichun Liu, Zeshan Lin, Chang Liu, Jiong Zhou, Guangping Huang, Zihe Li, Jianping Yu, Yaolei Zhang, Yue Yang, Bingzhao Zhuo, Baowei Zhang, Jiang Chang, Haiyuan Qian, Yingmei Peng, Xianqing Chen, Lei Chen, Zhipeng Li, Qi Zhou\*, Wen Wang\*, Fuwen Wei\*

#These authors contributed equally to this work.

\*Corresponding author. E-mail: weifw@ioz.ac.cn (F.W.); wenwang@nwpu.edu.cn (W.W.); zhouqi1982@zju.edu.cn (Q.Z.);

**This Supplementary Information includes:**

**Supplementary Notes**

**Supplementary Figures 1-27**

**Supplementary Tables 1-18**

## 29 **Supplementary Notes:**

### 30 **Samples collection**

31 In this study, we collected various types of samples from five species, including  
32 *Hydropotes inermis*, *Muntiacus reevesi*, *M. gongshanensis*, *M. crinifrons*, and  
33 *Elaphurus davidianus*. The blood samples of two female *M. crinifrons* individuals  
34 (female MCR1, female MCR2), two male *M. crinifrons* individuals (male  
35 MCR1, male MCR2) and one male *M. reevesi* individual (MRE1) were collected from  
36 Hefei Wild-life Zoo, Hefei City, Anhui province, China. The blood sample of one *H.*  
37 *inermis* individual (HIN1) were collected from a farm in Yancheng, Jiangsu province,  
38 China. The blood sample of one *E. davidianus* was collected from the Beijing Milu  
39 Ecological Research Center. In addition, the frozen tissue samples of a female *M.*  
40 *crinifrons* individual (female MCR3), a male *M. crinifrons* individual (male MCR3),  
41 two *M. gongshanensis* individuals (MGO1, MGO2), the fibroblast cell lines of the  
42 skin sample from a male *M. crinifrons* individual (male MCR4) and the lung sample  
43 from a female *M. crinifrons* individual (female MCR4) were provided by Kunming  
44 Cell Bank of the Chinese Academy of Sciences (**Supplementary Table 1**).

45 All animal specimens were collected legally in accordance to the policy of Animal  
46 Care and Use ethics of each institution, which meets or exceeds US regulatory  
47 standards for the humane care and treatment of animals in research.

48

### 49 **Library construction and Sequencing**

50 The high-quality DNA of above samples was extracted using a DNeasy Blood & Tissue  
51 Kit (Qiagen, Valencia, CA, USA) Qiagen Kit according to the manufacturer's  
52 instructions. Then these DNA samples were used to construct different libraries for  
53 Nanopore, NGS and Hi-C sequencing. The Nanopore libraries with an insert size of 20  
54 kb were sequenced using R9.4 flow cells on the GridION X5 sequencer (ONT, UK) at  
55 the Genome Center of Grandomics (Wuhan, China). The ONT Albacore software was  
56 used to perform the base calling, adaptor removal and low-quality base filtration on

57 fast5 files. The NGS libraries with an insert size of 400bp was constructed and then  
58 sequenced on Illumina NovaSeq platform with the paired-end read length of 150bp.  
59 The Hi-C libraries were constructed and sequenced using Illumina NovaSeq platform.  
60 The information for clean data of Nanopore, NGS and Hi-C sequencing are listed in  
61  
62  
63  
64  
65 Supplementary Table 2-4, respectively.

66 mRNAs were isolated from the two cell line samples of *M. crinifrons* according to  
67 the TRIZol (Invitrogen, USA) protocol. Sequencing libraries for 150 bp paired-end  
68 reads were then generated and sequenced using an Illumina HiSeq platform. Finally, a  
69 total of 6 Gb paired-end RNA-seq sequencing data were generated for each sample.

70

#### 71 **Assembly of contig-level genome**

72 In this study, we firstly assembled the contig-level genomes for *M. reevesi*, *M.*  
73 *gongshanensis*, female and male *M. crinifrons* using long reads and then polished  
74 them using high-quality Illumina short reads. Briefly, for the genomes of *M. reevesi*  
75 and female *M. crinifrons*, the nanopore long reads from individual MRE1 and female  
76 MCR1 were firstly assembled using SMARTdenovo <sup>1</sup> (veriosn 1.0, with parameter -k  
77 21 -J 3000 -t 20), and then the paired-end Illumina reads from the same individuals  
78 were used to polish the genomes using Nextpolish software <sup>2</sup> (version1.2.4, with  
79 parameter best). For the genome of *M. gongshanensis*, the nanopore long reads of  
80 individual MGO1 were firstly assembled using the SMARTdenovo <sup>1</sup>, then the Racon  
81 software <sup>3</sup> (version 1.21 with default parameter) and Pilon software <sup>4</sup> (version 1.23  
82 with default parameter) were used to polish the genome using raw nanopore reads and  
83 high-quality Illumina reads. For the genome of male *M. crinifrons*, the PacBio reads  
84 were downloaded from NCBI (PRJNA438286) and reassembled using wtdbg2 <sup>5</sup>

85 (version 2.5, with default parameter), then the Racon and Pilon software <sup>4</sup> were used  
86 to polish this assembly using long reads and Illumina reads, respectively. The  
87 statistics of these draft assemblies are listed in **Supplementary Table 5**. The genome  
88 size of these muntjac species are similar to that assembled using Illumina reads by  
89 Chen et al. <sup>6</sup>.

90

### 91 **Chromosome assembly by Hi-C data**

92 We improved the newly assembled genomes of *M. reevesi*, female and male *M.*  
93 *crinifrons* and previous published *H. inermis* genome downloaded from NCBI  
94 (GCA\_006459105.1) to chromosome level using 52~71 folds high-quality high  
95 throughput chromatin conformation capture (Hi-C) data (**Supplementary Table 4**).  
96 Firstly, the paired-end Hi-C reads of female and male *M. crinifrons*, *M. reevesi* and *H.*  
97 *inermis* were aligned to their contig-level draft genomes using Juicer software <sup>7</sup>  
98 (version 1.5.7). Then the 3D-DNA software <sup>8</sup> (version 180922) was used to order and  
99 orientate the contigs. Finally, the Juicebox Assembly Tools <sup>9</sup> was used to help  
100 manually correct the position and orientation of contigs based on the Hi-C contacted  
101 heatmaps. The statistics of these chromosome-level genomes were listed in  
102 **Supplementary Table 5**. The chromosome 1p+4 (neo-Y chromosome) of male *M.*  
103 *crinifrons* were manually adjusted using male-specific mutations.

104

### 105 **Synteny with *B. taurus* genome**

106 We performed the genome synteny analysis by aligning the five genomes we  
107 assembled to *B. taurus* genome (ARS-UCD1.2) using LAST software <sup>10</sup> (version  
108 885). Briefly, each genome was firstly aligned to *B. taurus* genome using "lastal"  
109 command with parameter: -E0.05. Then the "maf-swap" command was used to  
110 change the order of the sequences in MAF-format and the best pairwise aligned  
111 blocks was obtained by using "last-split" command with the parameter: -m1. The  
112 synteny relationships between the these genomes and *B. taurus* genome are presented

113 by Circos (version 0.69-6)<sup>11</sup> after filtering < 2 kb alignment segments.

114

### 115 **Repeat Annotation**

116 To predict gene models, various type of repeats should be firstly identified and  
117 masked. Tandem repeats were annotated by Tandem Repeat Finder (TRF)<sup>12</sup> (version  
118 4.07b; with parameters: 2 7 7 80 10 50 2000 -d -h). Long terminal repeat  
119 retrotransposons (LTR elements) were found out by LTR\_FINDER (version 1.0.5)<sup>13</sup>.  
120 The RepeatModeler<sup>14</sup> (version 1.0.4) software was used to build *de novo* repeat  
121 library. Transposable elements (TE) on genomes were annotated by mapping TE from  
122 the *de novo* repeat library and the Repbase TE library<sup>15</sup> (version 16.02) against  
123 genomes using RepeatMasker<sup>14</sup> (version 4.0.5; with parameters: -nolow -no\_is -norma  
124 -parallel 1). TE-relevant proteins were identified by RepeatProteinMask software (a  
125 package in RepeatMasker) (version open-4.0.6, with parameters: -noLowSimple -p  
126 value 0.0001).

127

### 128 **Gene annotation**

129 We used the combined pipeline of *de novo* and homology-based method to predict  
130 genes as the Ruminant Project<sup>6</sup>. In brief, SNAP (version 2006-07-28)<sup>16</sup>, GENSCAN  
131 (version 1.0)<sup>17</sup>, GlimmerHMM (version 3.0.4)<sup>18</sup>, and AUGUSTUS (version 2.5.5;  
132 Augustus: Gene Prediction)<sup>19</sup> were separately used to annotated gene models *de novo*  
133 based on the repeat-masked genomes. For homology-based predictions, the protein  
134 sequences of *Homo sapiens*<sup>20</sup> (Ensemble 87 release), *B. taurus*<sup>21</sup> (Ensemble 87  
135 release) and *Ovis aries*<sup>21</sup> (Ensemble 87 release) were used as templates. First, the  
136 protein sequences were aligned to the genomes by TBLASTN<sup>22</sup> with an E-value cut-  
137 off of 1e-5. The blast hits were transformed into candidate gene locus with GenBlastA  
138<sup>23</sup>. Then the genomic sequences of candidate gene loci were extracted and subjected to  
139 perform more precise alignment using GeneWise (version 2.2.0)<sup>24</sup>. The  
140 EVidenceModeler software<sup>25</sup> (EVM, version 1.1.1) was used to integrate the gene

141 models predicted by *de novo* and homology approaches. Completeness evaluation of  
142 gene annotation was carried out using BUSCO <sup>26</sup> (version 3.0.2). The function of  
143 protein coding genes were annotated by aligning their protein sequence to the  
144 SwissProt and KEGG database using BLAST <sup>27</sup> (version 2.2.26; parameter: blastall -p  
145 blastp -b 100 -v 100 -e 1e-5 -m 8 ). When a gene is aligned by multiple proteins in  
146 SwissProt or KEGG database, the one with the highest blast score is remained.

147

#### 148 **Delineating the regions of fusion sites**

149 For each chromosome of female *M. crinifrons*, we used an in-house python script to  
150 detect the regions of fusion site which were defined as the interval regions between  
151 two adjacent large-scale syntenic blocks that aligned by different chromosomes of *B.*  
152 *taurus* or *H. inermis*. In this study, when the regions of the same fusion site inferred  
153 by *B. taurus* and *H. inermis* were different, the smaller one was selected in the  
154 subsequent analysis.

155 We used the following steps to counts the number of gaps in the fusion sites and  
156 in the whole genome, Firstly, the gap was set to be 500 Ns when the 3D-DNA <sup>8</sup> was  
157 used for chromosome assembly, so the number of gaps could be directly counted in  
158 whole genome and in the fusion site regions. A total of 261 gaps were identified in  
159 whole genome of female *M. crinifrons*, 35 of which are located in fusion site regions  
160 and their flanking 200 kb regions (200 kb upstream and downstream of each fusion  
161 site). Then, we mapped the Illumina reads of the individual female MCR2 to the  
162 reference genome using BWA <sup>28</sup> with default parameter and calculated the coverage of  
163 each locus using SAMtools (samtools depth -a) <sup>29</sup>. The region is regarded as a gap  
164 when the coverage of 100 consecutive loci are all zero. We found two more gaps  
165 using this strategy. Finally, we scanned the alignments of nanopore reads on the  
166 genome and found a connection error in the fusion site region chr2: 470,398,810-  
167 470,568,565, which was also regarded as a gap. In total, we found 264 gaps in the  
168 whole genome, 38 of which are located in the fusion site (**Supplementary Table 13**).

169 These results show that the average density of gaps is 2.0 per Mb and 0.09 per Mb in  
170 fusion site region and the rest genomic regions, respectively. For the 31 fusion site  
171 regions, only one (chr2: 61,703,828-62,110,032) does not contain any gap which  
172 could be confirmed by the accurate alignment of nanopore reads at this fusion site  
173 **supplementary Fig. 19**<sup>30</sup>.

174

175 **Extracting monomers of three satellite sequences specific to Cervidae from**  
176 **female *M. crinifrons* genome**

177 To calculate the content of satellite and telomeric sequences in the fusion site regions,  
178 we firstly downloaded three classes of Cervidae-specific satellite sequence cloned by  
179 Liu et al. in *M. crinifrons*<sup>31</sup>. Then by exploring the homologous sequences of these  
180 downloaded satellite sequence in the tandem repeat annotation results of our female  
181 *M. crinifrons* genome, two types monomers for satellite I (satI\_980 and satI\_790) and  
182 monomer for satellite II (satII) and satellite IV (satIV) were identified.

183

184

185

186

187

188

189

190

191

192

193

194

195

196

197

198

199

200

201 **Supplementary Figures**

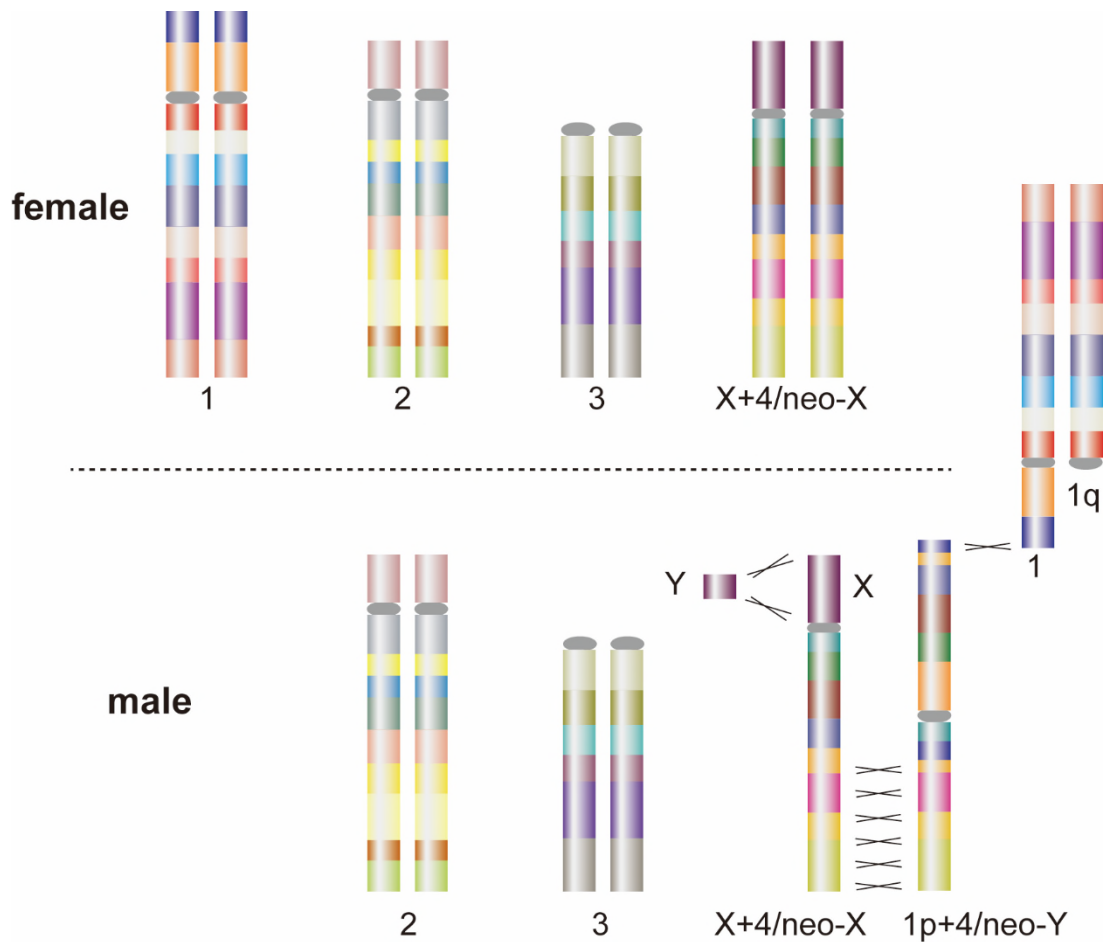

202

203 **Supplementary Figure 1. Karyotype pairing diagram of *M. crinifrons*.** Segments

204 with different colors represent different ancestral chromosomes. Gray ellipses

205 represent centromeres. The cross between chromosome Y, X+4, 1p+4, 1q in male *M.*

206 *crinifrons* indicates their pairing relationship. 1p and 1q mean short arm and long arm

207 of chromosome 1, respectively.



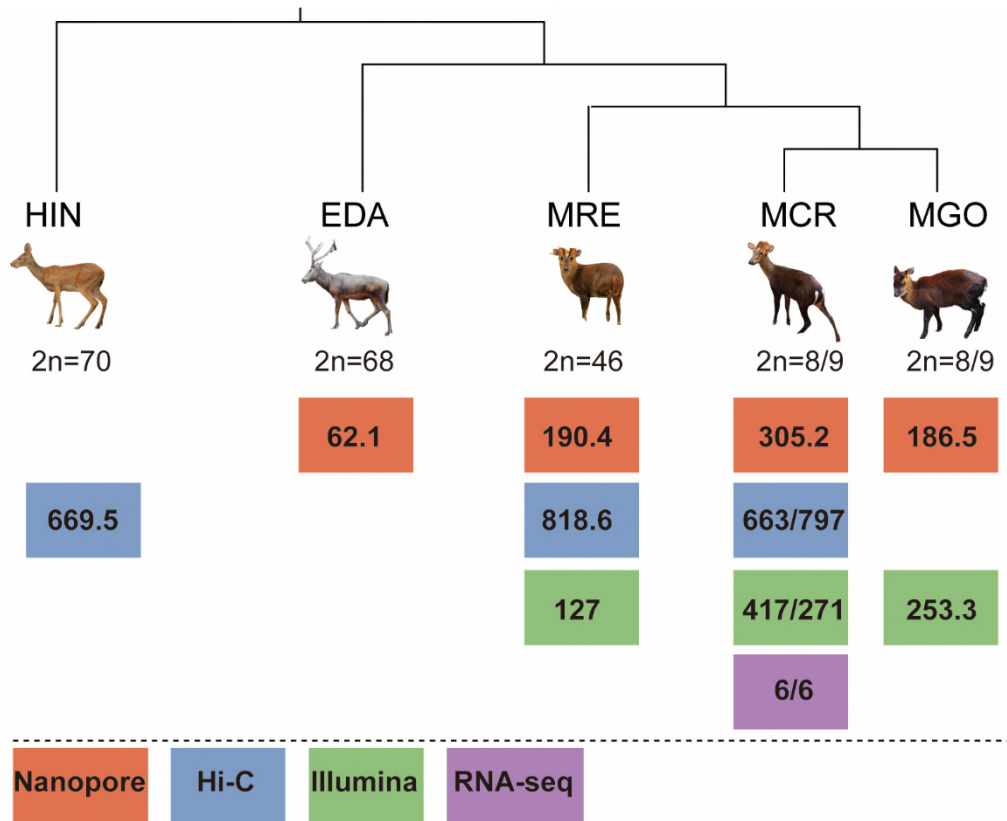

208

209

**Supplementary Figure 2. Summarized information of species, sequencing**

210

**technology and amount of data in this study.** The amount of data is in Gb. HIN, *H.*

211

*inermis*; EDA, *E. davidianus*; MRE, *M. reevesi*; MGO, *M. gongshanensis*; MCR, *M.*

212

*crinifrons*. The data of female and male *M. crinifrons* are counted separately and

213

showed by diagonal lines. Detailed information can be found in the Supplementary

214

Table 1-4.

215

female MCR

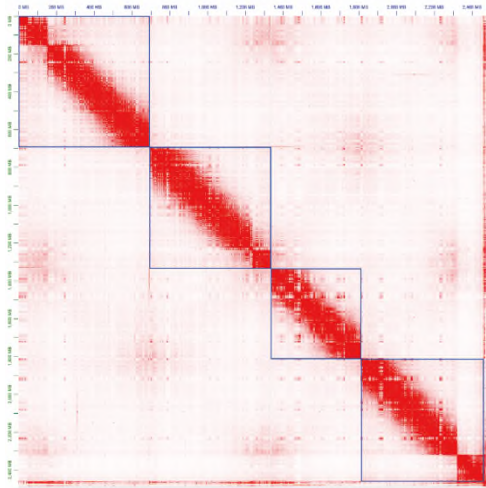

male MCR

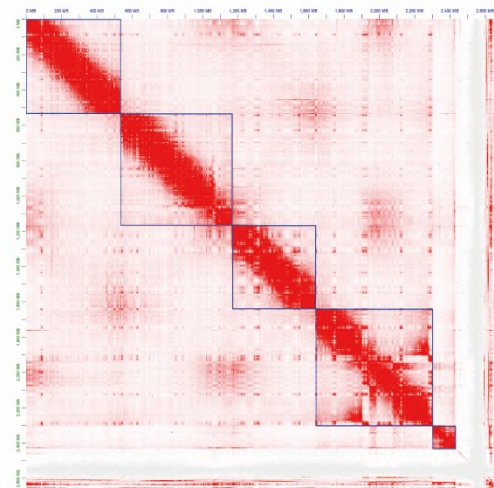

MRE

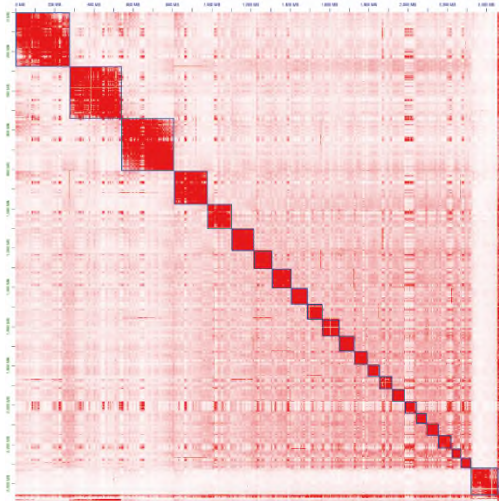

HIN

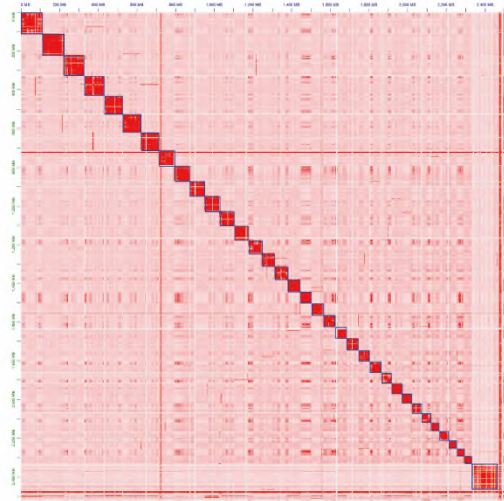

216

217 **Supplementary Figure 3. Heatmap of Hi-C interactions on chromosomes-level**  
218 **genomes.** Each chromosome is framed in blue box. From top left to bottom right are  
219 the chromosome 1, 2, 3 and X+4 of female *M. crinifrons* (female MCR), the  
220 chromosome 1q, 2, 3, 1p+4 and X of male *M. crinifrons* (male MCR), the  
221 chromosome 1-22 and X of *M. reevesi* (MRE) and the chromosome 1-34 and X of *H.*  
222 *inermis* (HIN), respectively. 1p and 1q represent short arm and long arm of  
223 chromosome 1, respectively.

224

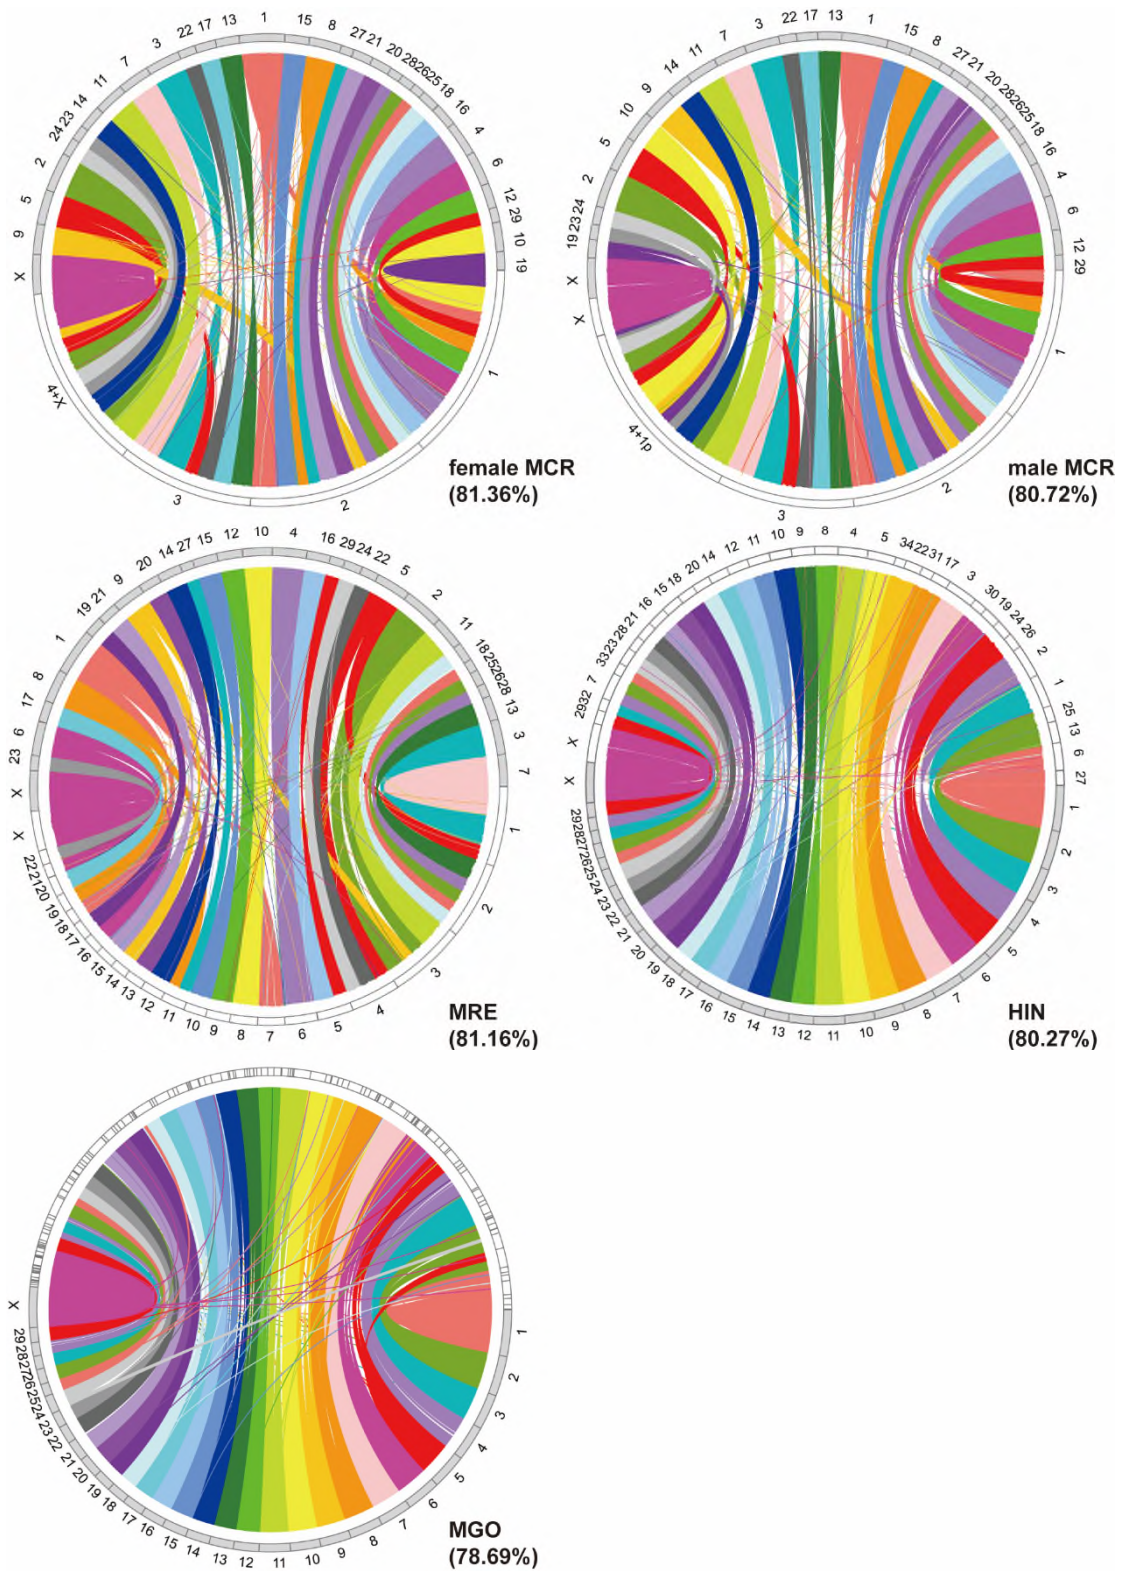

225

226 **Supplementary Figure 4. Circos plot showing alignments of five genomes we**  
 227 **assembled against to *B. taurus* genome.** The alignments less than 2kb were  
 228 discarded for clearer displaying. Gray blocks represent *B. taurus*'s chromosomes,  
 229 while white blocks represent chromosomes of female and male *M. crinifrons* (MCR),

230 *M. reevesi* (MRE) and *H. inermis* (HIN) or contigs of *M. gongshanensis* (MGO).  
231 Numbers near chromosome blocks represent chromosome codes. The percentage in  
232 brackets indicates proportion of sequence in *B. taurus* genome aligned by each  
233 genome.

234

235

236

237

238

239

240

241

242

243

244

245

246

247

248

249

250

251

252

253

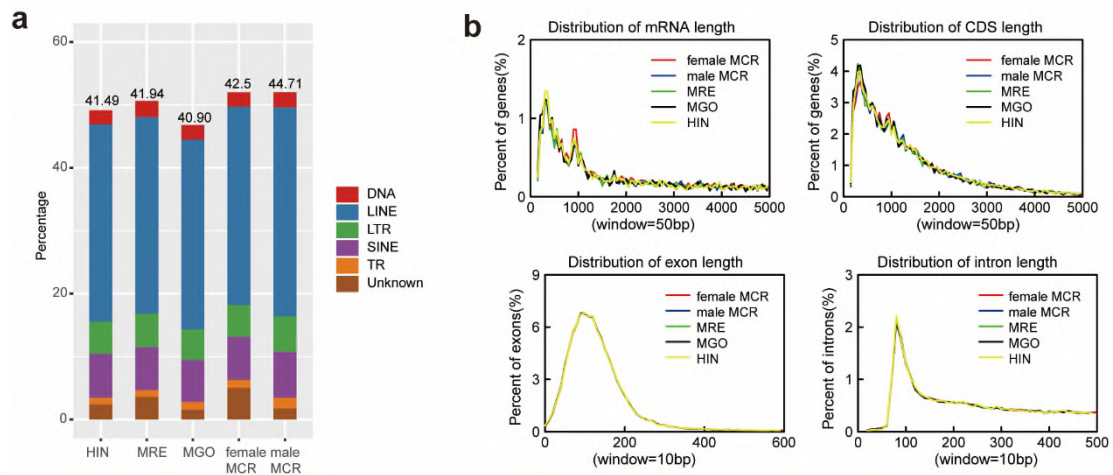

254

255

**Supplementary Figure 5. Genome annotation. a** Content of annotated repetitive

256

sequence. The percentage of total repetitive sequence in each genome is showed

257

above the pillar. The total percentage value is not equal to the sum of percentage of

258

different types repeats due to the overlap of them. HIN, *H. inermis*; MRE, *M. reevesi*;

259

MGO, *M. gongshanensis*; MCR, *M. crinifrons*. **b** Statistical results of annotated

260

protein coding genes.

261

262

263

264

265

266

267

268

269

270

271

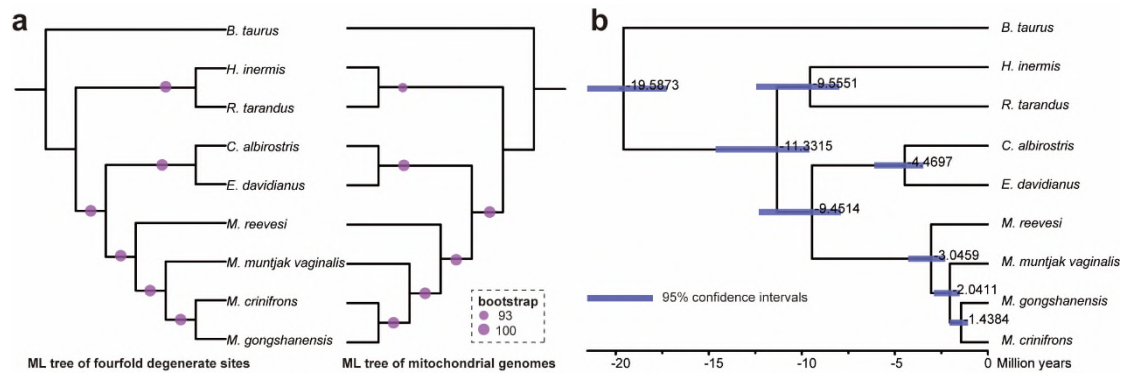

272

273 **Supplementary Figure 6. Phylogeny and divergent time. a** Consistent maximum  
 274 likelihood (ML) phylogenetic tree from fourfold degenerate sites (4dTV) and  
 275 mitochondrial genomes. 200 and 1000 bootstrap replicates were used to calculate the  
 276 support for each node on 4dTV and mitochondrial genomes tree, respectively. The  
 277 size of purple dots represents the percentage of bootstrap repeats supporting a node. **b**  
 278 Divergence time of muntjac deer and outgroup species.

279

280

281

282

283

284

285

286

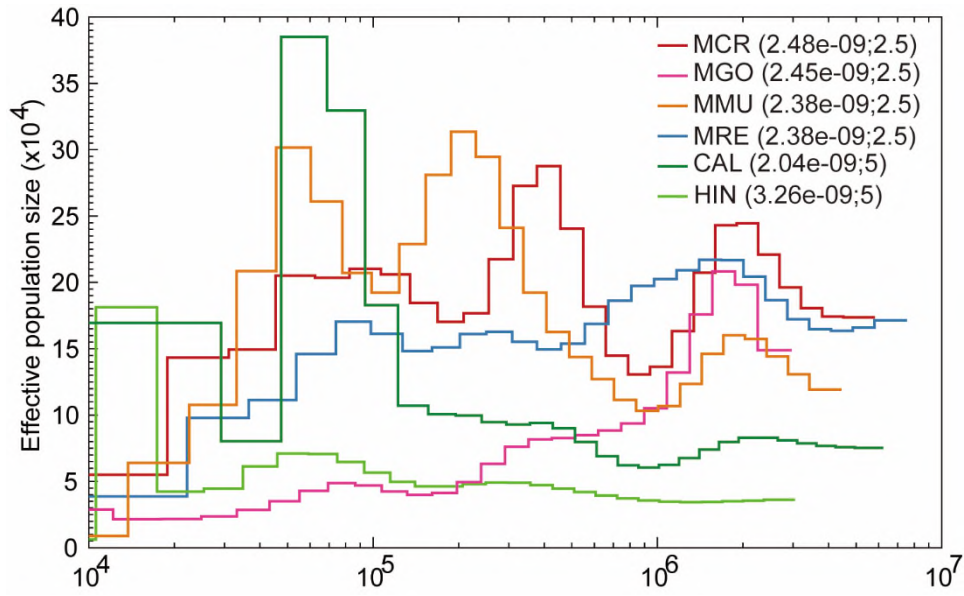

287

288 **Supplementary Figure 7. Demographic history of muntjac deer and related**

289 **Cervidae species.** Mutation rate estimated by r8s and generation time are putted in

290 parentheses after species id. MCR, *M. crinifrons*; MGO, *M. gongshanensis*; MMU, *M.*

291 *muntjak vaginalis*; MRE, *M. reevesi*; CAL, *C. albirostris*; HIN, *H. inermis*.

292

293

294

295

296

297

298

299

300

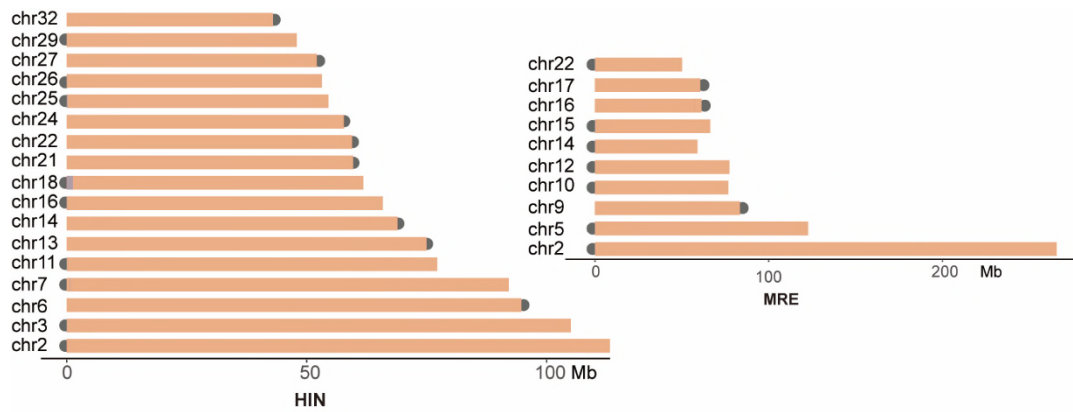

301

302 **Supplementary Figure 8. Centromeric positions on some chromosomes of *H.***

303 *inermis* (HIN) and *M. reevesi* (MRE). Gray semicircle represents centromere

304 identified by scanning Cervidae-specific centromeric satellite sequences. Horizontal

305 orange bars represent chromosomes with the chromosome code on the left.

306

307

308

309

310

311

312

313

314

315



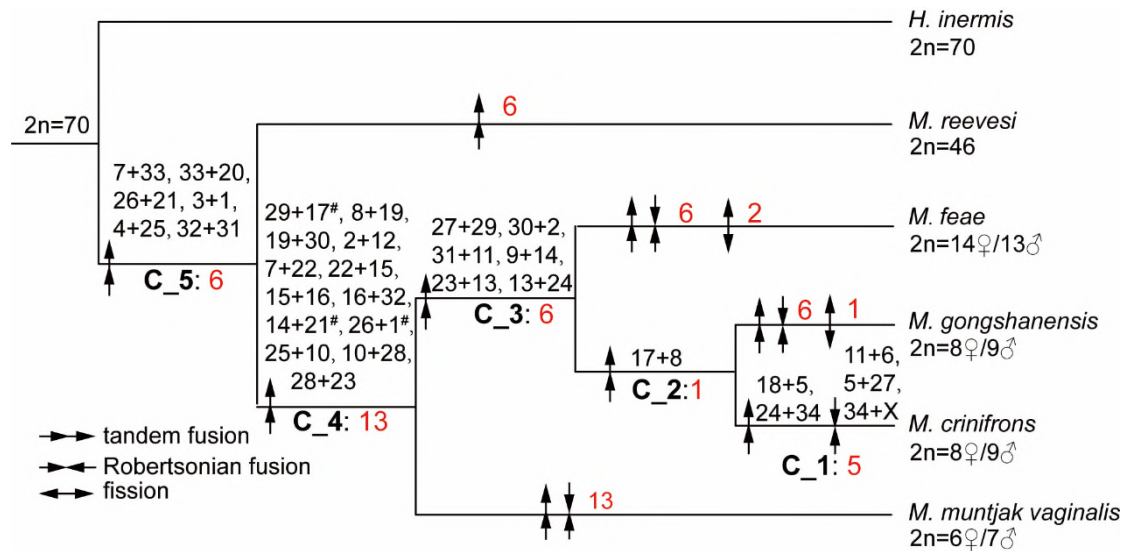

316

317 **Supplementary Figure 9. Chromosome fusion events leading to the female *M.***

318 *crinifrons*. The “+” indicates chromosome fusion events happened between its

319 flanked ancestral chromosomes represented by chromosome names of *H. inermis*. The

320 red numbers indicate the number of fusion or fission events. C\_1~C\_5 marked five

321 chromosomal evolution stages in female *M. crinifrons*. Three fusion events in C\_4

322 were marked using “#” because of their further fission in *M. feae* or *M.*

323 *gongshanensis*.

324

325

326

327

328

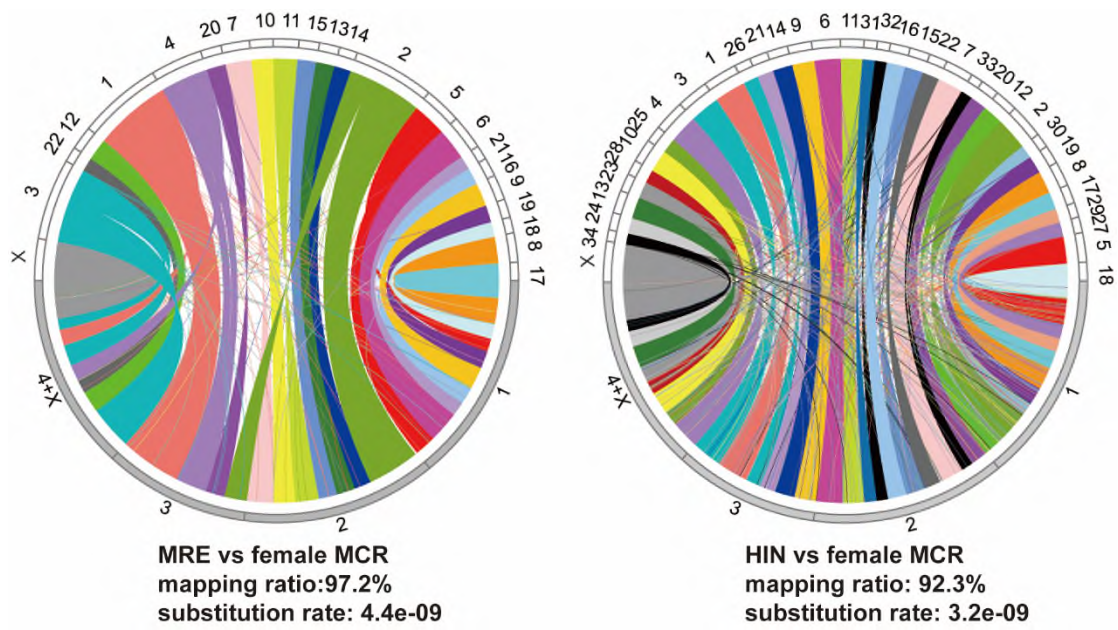

329

330 **Supplementary Figure 10. Circos plot showing genome alignments of female *M.***

331 ***crinifrons* with its related species.** Gray boxes indicate chromosomes of female *M.*

332 *crinifrons* (MCR), and blank boxes indicate chromosomes of *H. inermis* (HIN) or *M.*

333 *reevesi* (MRE). Numbers near chromosome blocks represent chromosome numbers.

334

335

336

337

338

339

340

341

342

343

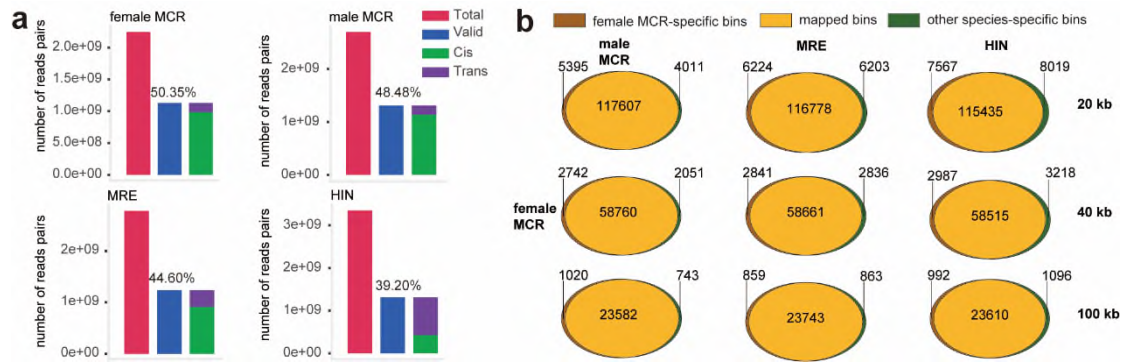

344

345 **Supplementary Figure 11. Hi-C reads pairs and homologous bins across**  
 346 **genomes. a** Number of Hi-C reads pairs of female and male *M. crinifrons* (MCR), *M.*  
 347 *reevesi* (MRE) and *H. inermis* (HIN). “Total” represents the total number of  
 348 sequenced Hi-C reads pairs. “Valid” represents the remained valid reads pairs to  
 349 construct contact matrix. Percentage of valid reads pairs were putted on the  
 350 corresponding bars. “Cis” and “Trans” indicates valid reads pairs with their two reads  
 351 aligned to the same chromosome and different chromosomes, respectively. **b** Number  
 352 of mapped homologous bins between female *M. crinifrons* and other three genomes at  
 353 20 kb, 40 kb and 100 kb resolutions.

354

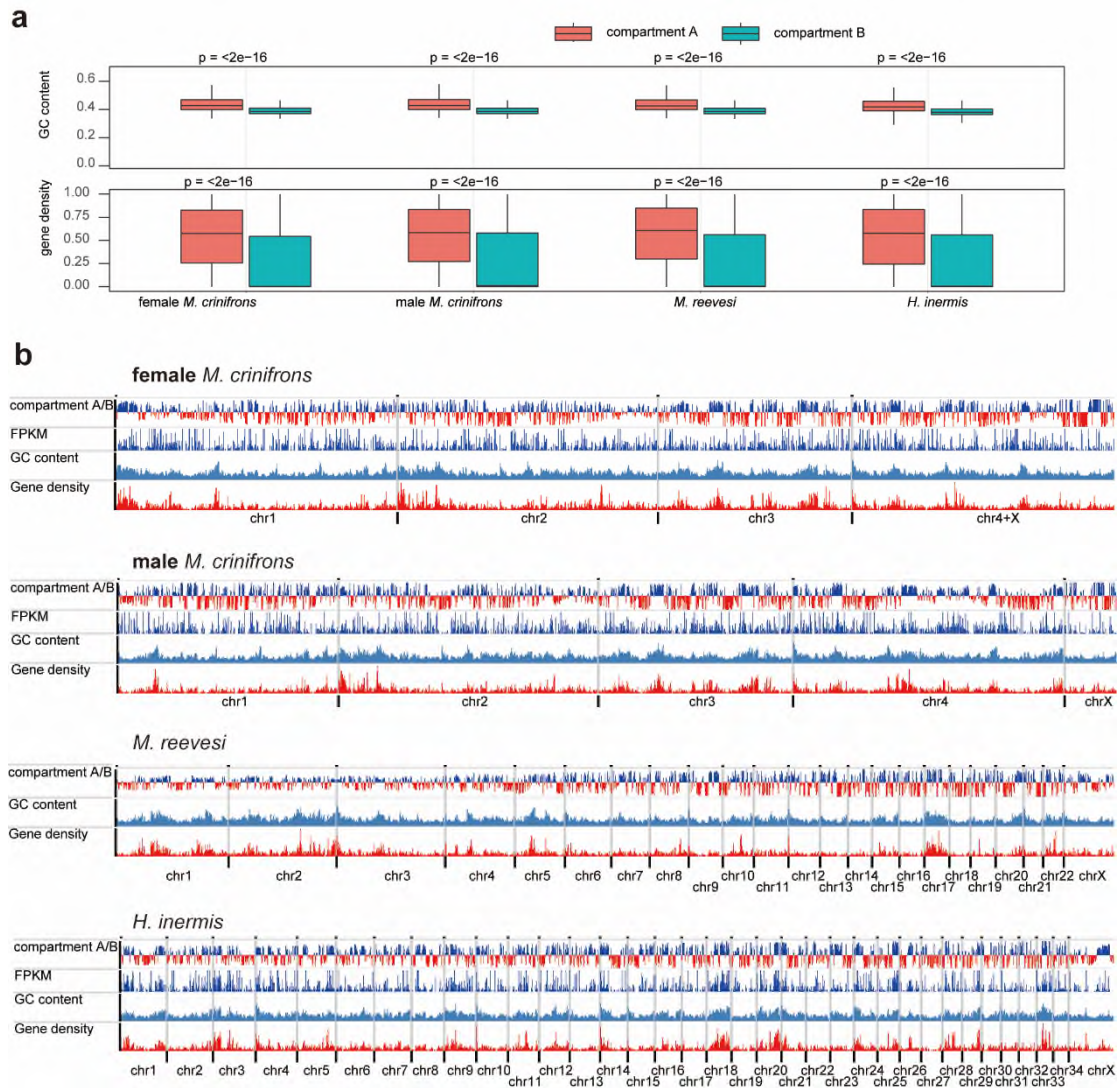

355

356 **Supplementary Figure 12. Compartment A/B and corresponding genome**

357 **sequence features. a** Boxplot of gene density and GC content in genomic

358 compartment A and B. In female and male *M. crinifrons*, *M. reevesi* and *H. inermis*,

359 the number of bins belonging to compartment A and compartment B are respectively

360 11,600 and 12,510, 11,727 and 12,112, 12,266 and 11,848, 12,290 and 11,922. The

361 lower and upper hinges correspond to the first and third quartiles. The horizontal line

362 inside the box is the median. The upper whisker extends from the hinge to the largest

363 value no further than  $1.5 * IQR$  from the hinge (where IQR is distance between the

364 first and third quartiles). The lower whisker extends from the hinge to the smallest

365 value at most  $1.5 * IQR$  of the hinge. Outlier are not displayed. The difference of gene

366 density or GC content in different compartment regions was checked using

367 independent two-sample *t*-test (two sides and *p*-value <0.05) without multiple  
368 comparisons adjustments. **b** Compartment A/B, gene expression level, GC content  
369 and gene density of female *M. crinifrons*, male *M. crinifrons*, *M. reevesi* and  
370 *Hydropotes inermis*. In the track of compartment A/B, the blue part represent the  
371 compartment A, and the red part represent compartment B. The gene expression level  
372 is represented by the FPKM (fragments per kilobase of transcript per million). GC  
373 content show the percentage of GC bases per 100 kb. Gene density is the total length  
374 ratio of genes per 100 kb. For male *M. crinifrons*, 1p and 1q represent short arm and  
375 long arm of chromosome 1, respectively.

376

377

378

379

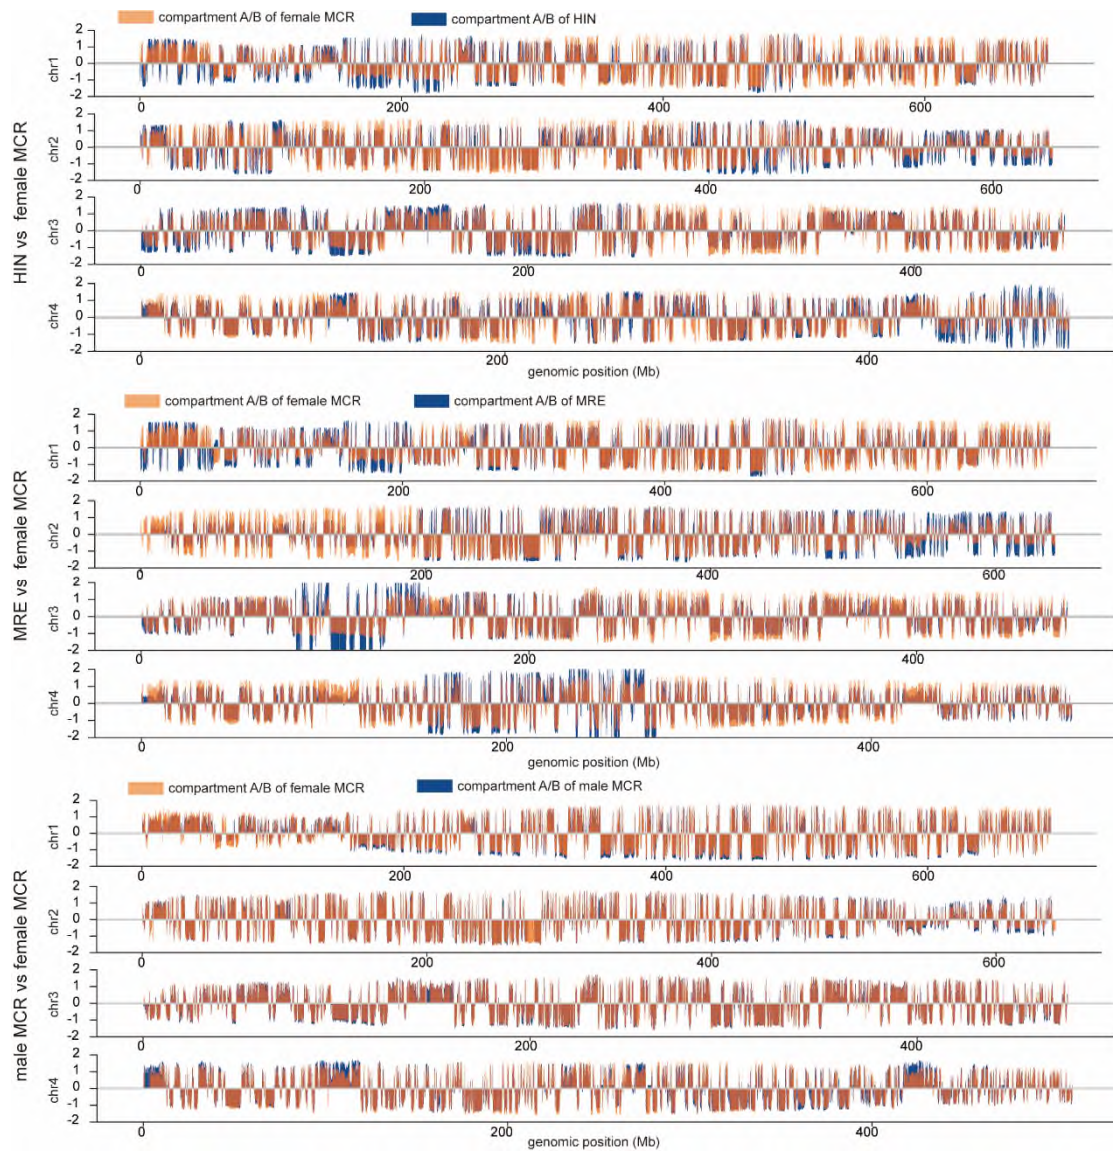

380

381 **Supplementary Figure 13. Comparison of compartment A/B between female *M.***  
 382 ***crinifrons* and other three genomes.** Compartment results of the three genomes were  
 383 mapped to the genome of female *M. crinifrons* according to their bins' homologous  
 384 relationship. On the ordinate, the value greater than zero means compartment A, and  
 385 that less than zero means compartment B. The transparent orange pillars represent the  
 386 compartment results of female *M. crinifrons* and the dark blue ones represent that of  
 387 other three genomes. MCR, *M. crinifrons*; MRE, *M. reevesi*; HIN, *H. inermis*.

388

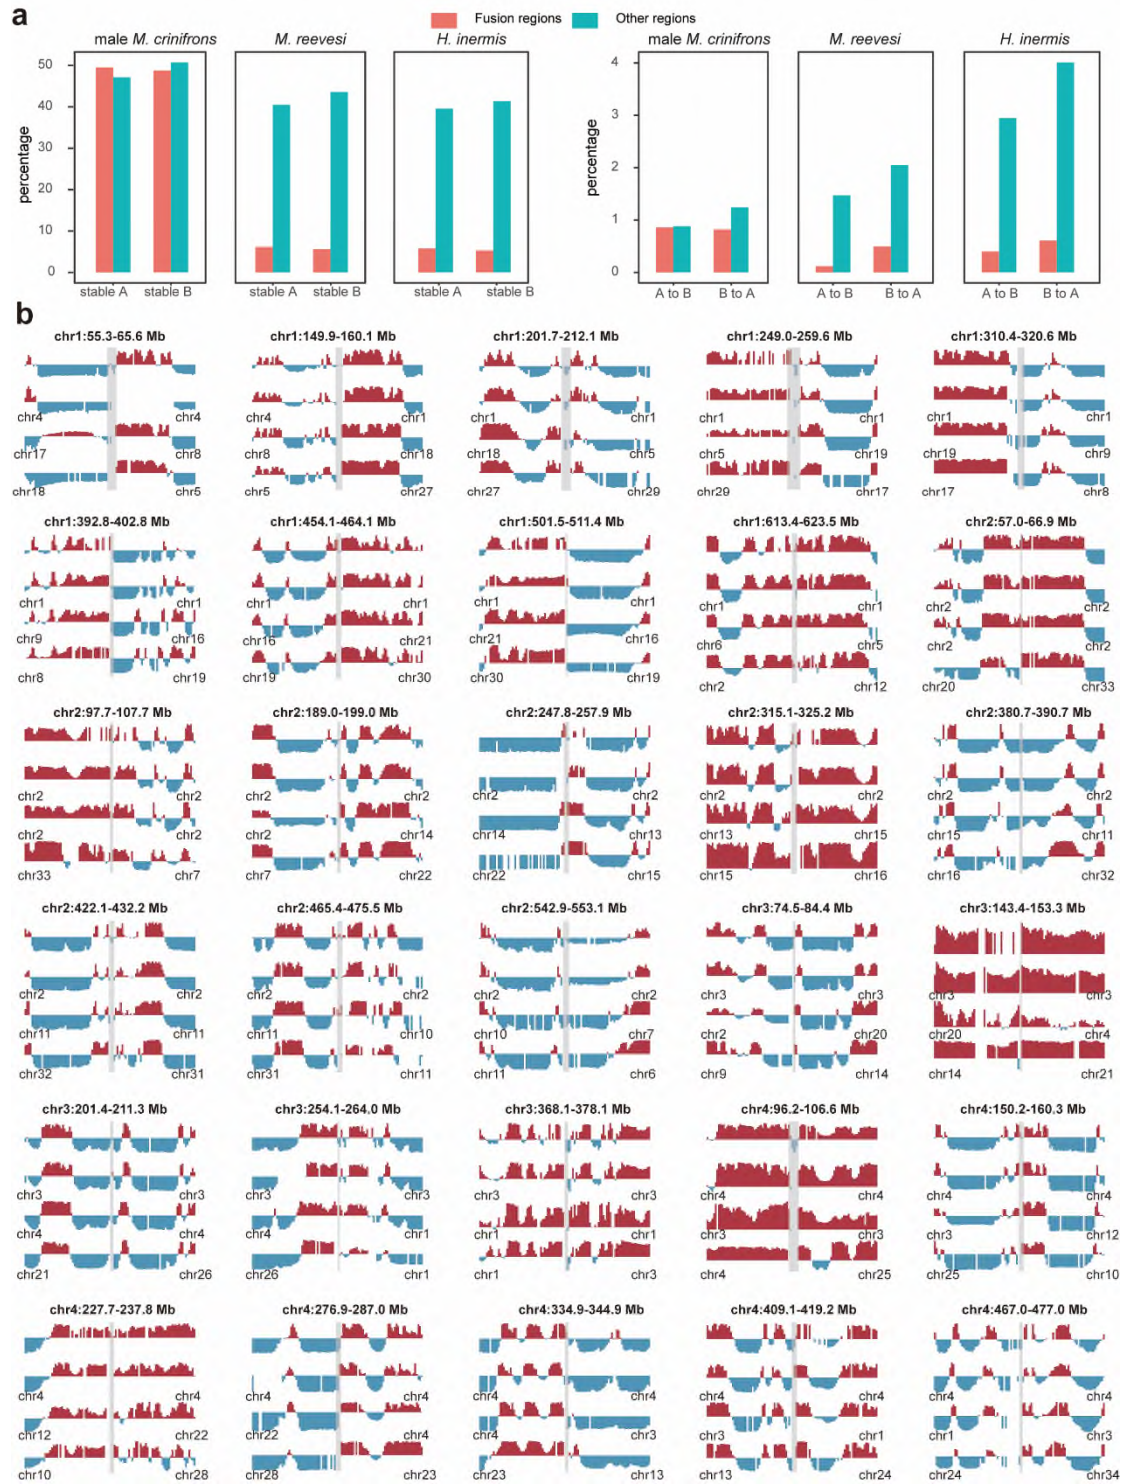

389

390 **Supplementary Figure 14. Comparison of compartment A/B near fusion sites. a**

391 Percentage of bins with switched or stable compartment A/B between female and  
 392 female *M. crinifrons*, *M. reevesi* and *H. inermis*. “Fusion regions” refers to female *M.*  
 393 *crinifrons* fusion site regions and their upstream and downstream 5 Mb regions. “other  
 394 regions” refers to the rest genomic regions except for the ancestral X chromosome

395 region. **b** Detailed compartment A/B in regions near fusion site of female *M.*  
396 *crinifrons* and their homologous regions in other three genomes. From top to bottom  
397 in each figure are female and male *M. crinifrons*, *M. reevesi* and *H. inermis*. Red and  
398 blue blocks indicates compartment A and compartment B, respectively. The gray  
399 transparent boxes mark the fusion sites. Under each graph of male *M. crinifrons*, *M.*  
400 *reevesi* and *H. inermis* are the chromosome names where these regions are located in  
401 their genomes.

402

403

404

405

406

407

408

409

410

411

412

413

414

415

416

417

418



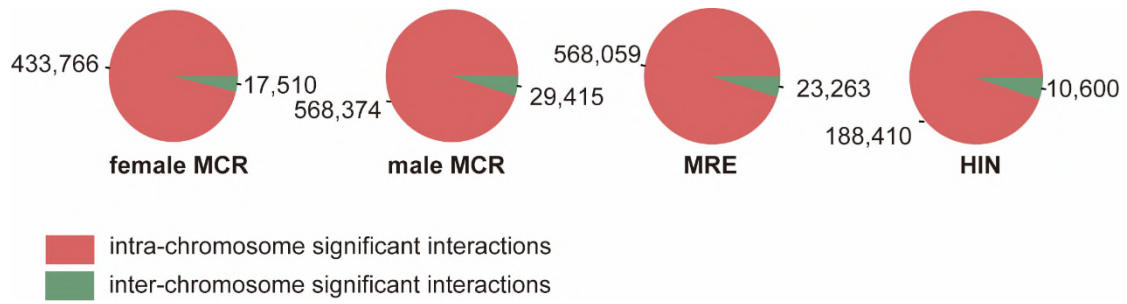

419  
420  
421  
422  
423  
424  
425  
426  
427  
428  
429  
430  
431  
432  
433  
434  
435

**Supplementary Figure 15. Total significant interactions.** Number and proportion of intra-chromosome and inter-chromosome significant interactions identified in female and male *M. crinifrons* (MCR), *M. reevesi* (MRE) and *H. inermis* (HIN).

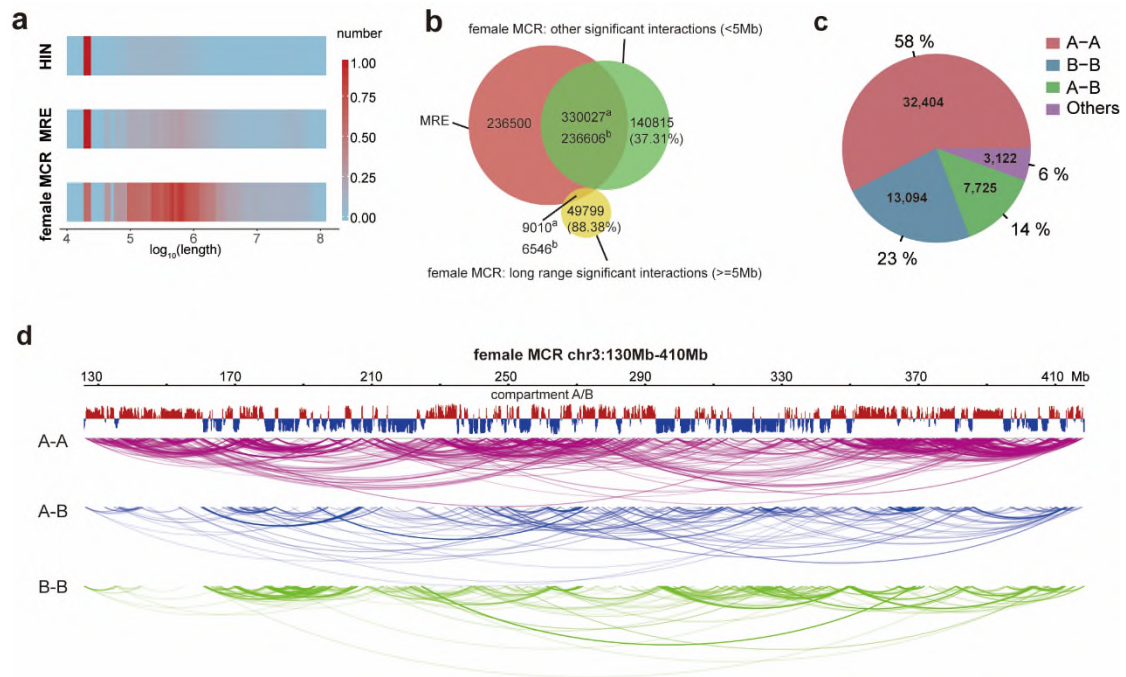

436

437 **Supplementary Figure 16. Lang-range significant interactions. a** Length

438 distribution of intra-chromosome significant interactions. The length of significant

439 interactions was transformed by  $\log_{10}$  function. The number of significant interactions

440 with different length in each genome was normalized by the maximum and minimum

441 values, respectively. **b** Number of shared and specific significant interactions between

442 *M. reevesi* and female *M. crinifrons*. Significant interactions of female *M. crinifrons*

443 with length more than 5 Mb and less than 5 Mb were separately displayed.

444 Superscript “a” indicates number of significant interactions of *M. reevesi* shared by

445 female *M. crinifrons* and superscript “b” indicates number of significant interactions

446 of female *M. crinifrons* shared by *M. reevesi*. In parentheses are the percentage of

447 significant interaction specific to female *M. crinifrons*. **c** Number and percentage of

448 long-range significant interactions ( $\geq 5$ Mb) with various compartment type at their

449 both ends in female *M. crinifrons*. “A-A”, long-range significant interactions (LRSI)

450 with compartment A at their both ends; “B-B”, LRSI with compartment B at their

451 both ends; “A-B”, LRSI with compartment A at one end and compartment B at

452 another end; “Others”, LRSI with no exact compartment type at any of their two ends.

453 **d** Compartment A/B and different type of LRSI in the region of chr3:130-410Mb in

454 female *M. crinifrons*. The red bars mark compartment A and the blue ones mark

455 compartment B.

456

457

458

459

460

461

462

463

464

465

466

467

468

469

470

471

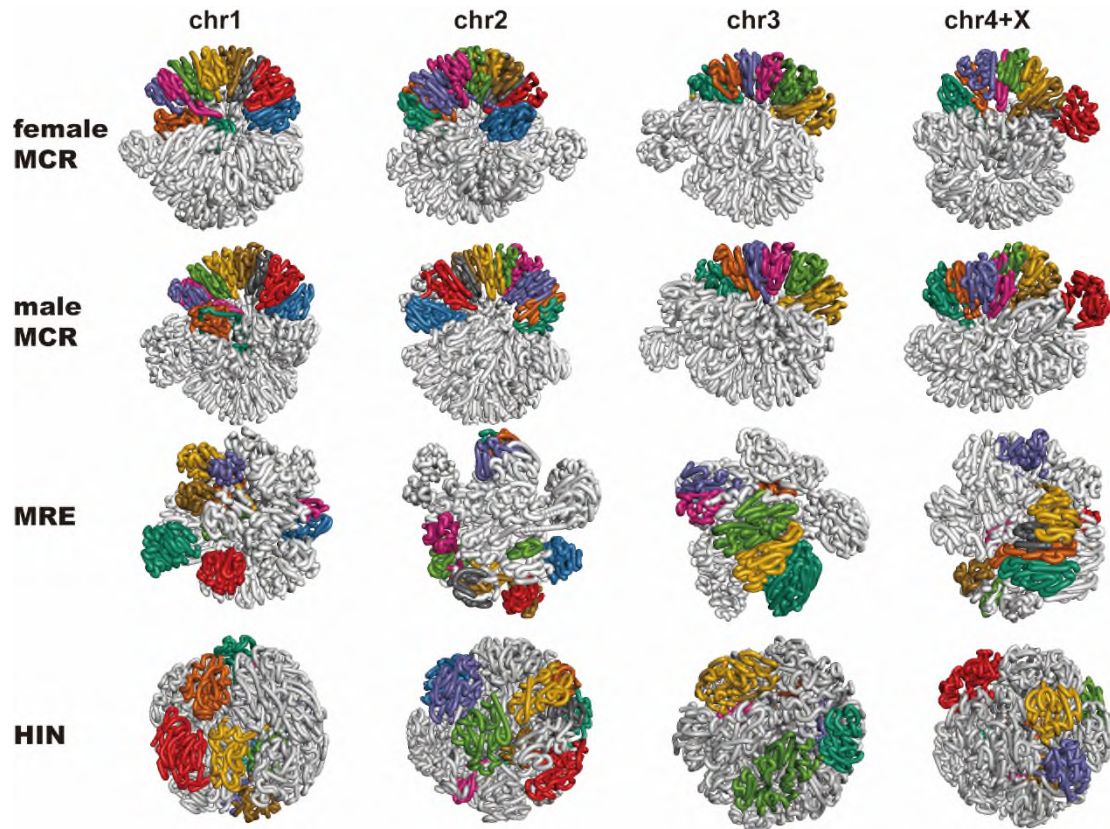

472

473 **Supplementary Figure 17. 3D genome structure of different genomes.** The “chr1”,

474 “chr2”, “chr3” or “chr4+X” at top of each column are the chromosome codes of

475 female *M. crinifrons*. In each column, only the corresponding chromosome of female

476 *M. crinifrons* and its homologous chromosomes or segments in other genomes are

477 colored, and the remaining chromosomes are gray. Segments of different colors in

478 each column represent different ancestral chromosomes, while the same color

479 indicates homologous ancestral chromosome segments in different genomes.

480

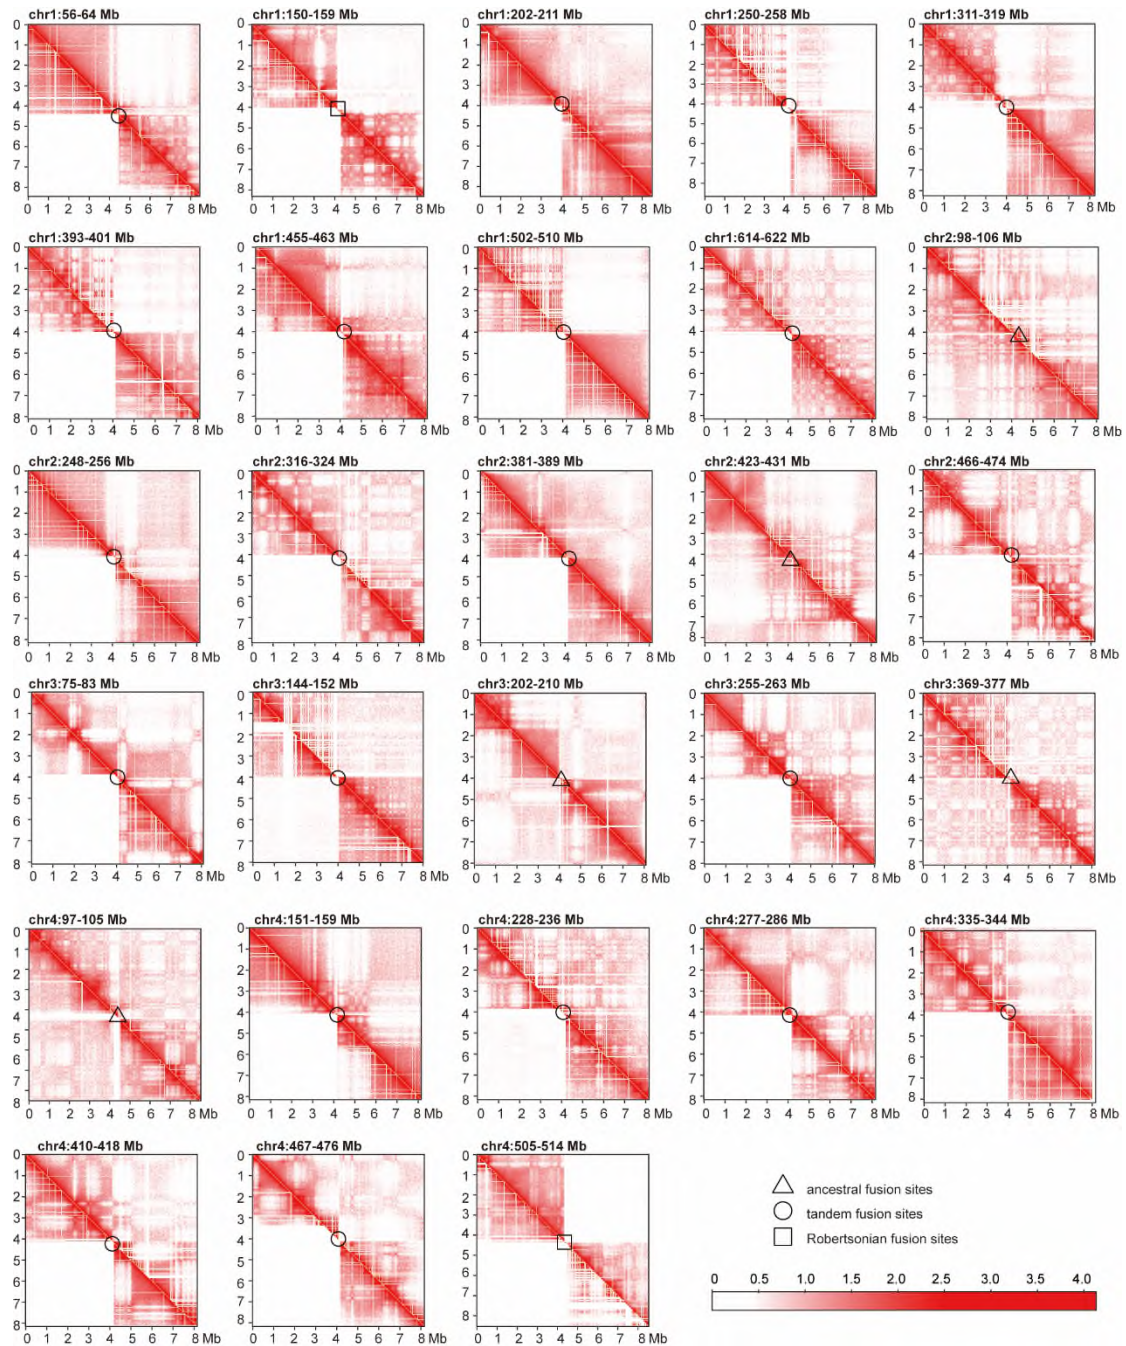

481

482 **Supplementary Figure 18. Combined heatmaps of contact matrix around the**  
 483 **fusion sites of female *M. crinifrons* (upper right) and their homologous regions in**  
 484 ***M. reevesi* (lower left) at 20 kb resolution. Hollow geometries marks the location of**  
 485 **fusion site. Different geometries represent different fusion site types. The “ancestral**  
 486 **fusion sites” refers to the oldest fusion sites shared by five muntjac species. The**  
 487 **“tandem fusion sites” represent the tandem fusion sites of female *M. crinifrons* except**  
 488 **the ancestral fusion sites. The “Robertsonian fusion sites” refers to fusion sites raised**  
 489 **by Robertsonian fusion and they are the youngest fusion sites.**

490

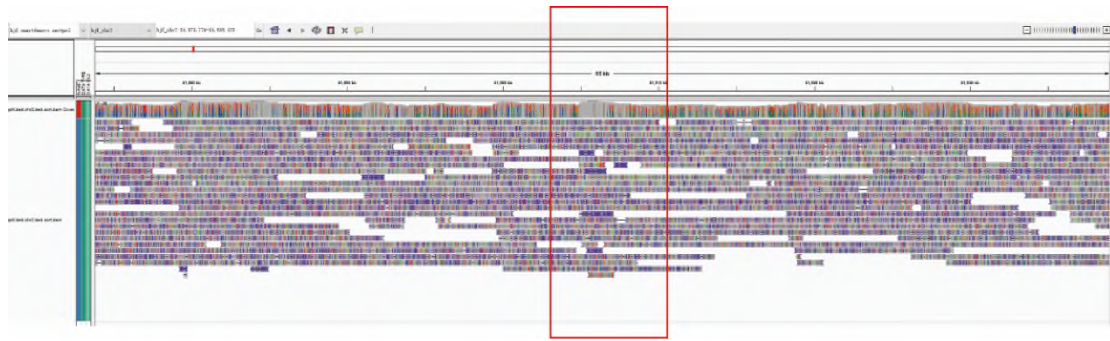

491

492 **Supplementary Figure 19. Nanopore reads alignment results at the completely**  
493 **assembled fusion site.** The alignment results of nanopore reads at the fusion site  
494 (chr2: 61,703,828-62,110,032) and its flanking regions are extracted from the  
495 Integrative Genomics Viewer (IGV). The red box demarcates the fusion site and its  
496 upstream and downstream 200 kb interval. Some reads can span the whole fusion site,  
497 suggesting the complete assembly of this fusion site.

498

499

500

501

502

503

504

505

506

507

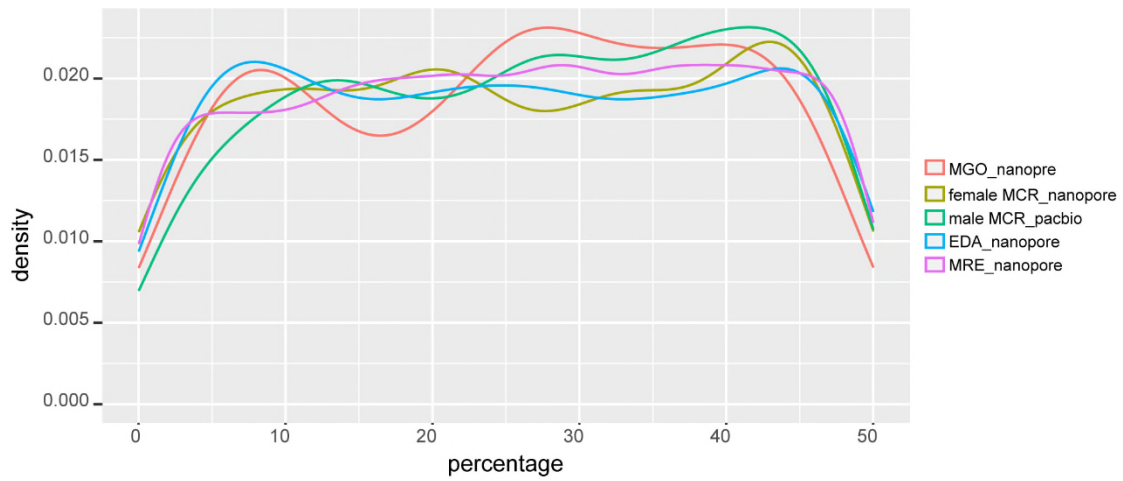

508

509 **Supplementary Figure 20. Density of reads with different distance between short**

510 **telomeric repeats from the reads' end.** The abscissa shows the percentage of

511 distance between the short telomeric repeat and its nearest read end to the total length

512 of the read. MGO, *M. gongshanensis*; MCR, *M. crinifrons*; EDA, *E. davidianus*;

513 MRE, *M. reevesi*.

514

515

516

517

518

519

520

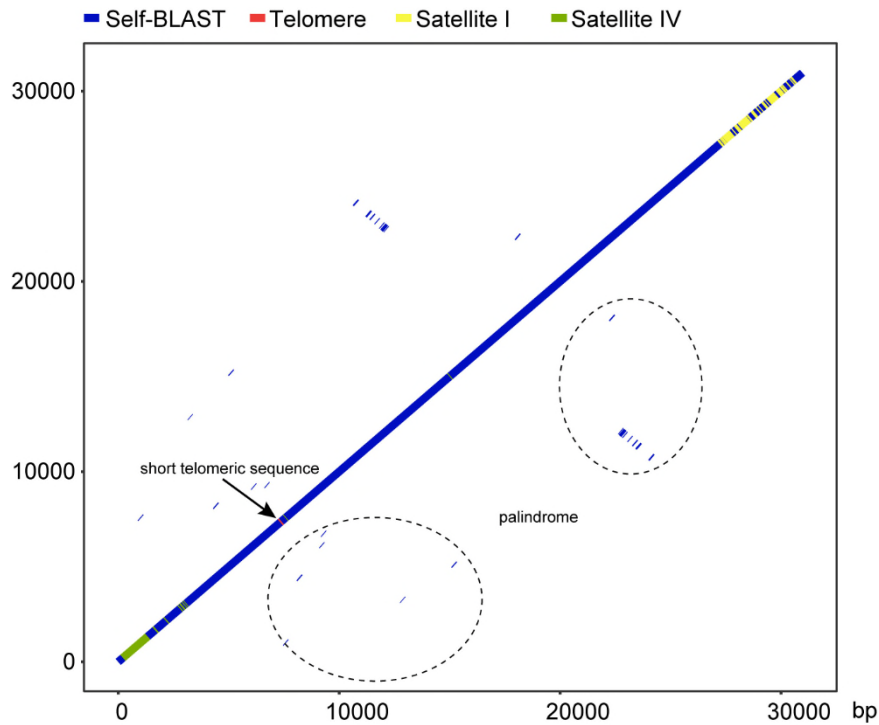

521

522 **Supplementary Figure 21. An example of reads which can be simultaneously**  
 523 **aligned by satellite I, IV and telomeric repeats.** One nanopore read, with the id  
 524 “dd3a0c38-516b-4d43-9f42-1a7db1bf3475”, from the female *M. crinifrons* was  
 525 aligned with satellite sequences and telomeric repeats, together with its self-  
 526 alignment, using BLAST. The dark blue short lines distributed on both sides of the  
 527 diagonal lines are palindrome and are encircled by dotted curve. There is a very short  
 528 telomeric sequence region on the read, which is marked out by an arrow.

529

530

531



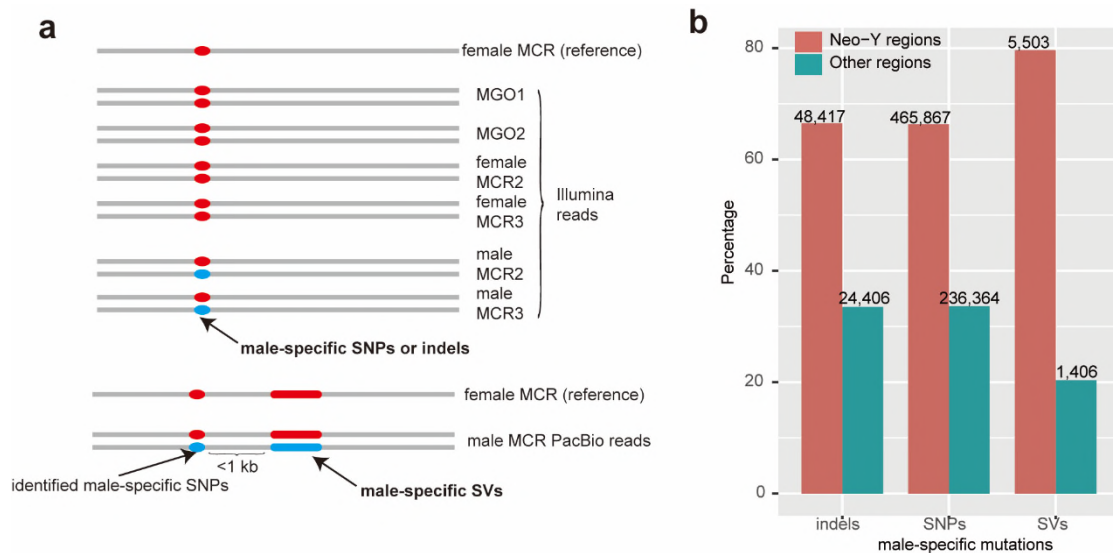

532

533 **Supplementary Figure 22. Candidate male-specific mutations. a** Schematic

534 diagram of identifying candidate male-specific mutations. Gray horizontal lines

535 represent homologous chromosomes, on which red circles or bars mean alleles the

536 same to reference and blue ones mean alternative alleles. On the right side of the gray

537 lines are sample ids. MCR, *M. crinifrons*; MGO, *M. gongshanensis*; SNPs, single

538 nucleotide polymorphisms; indels, insertions and deletions; SVs, structural variations.

539 **b** Proportion and number of candidate male-specific mutations in different genomic

540 regions. “Neo-Y regions” refer to the inverted regions on neo-Y chromosome. “Other

541 regions” refer to the rest genomic regions.

542

543

544

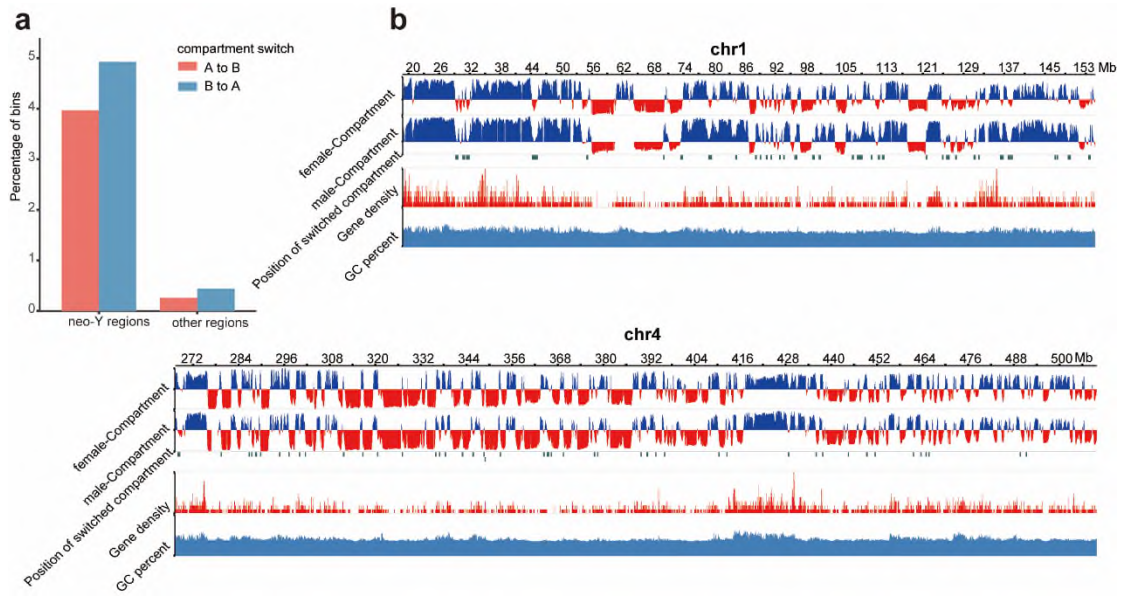

545

546 **Supplementary Figure 23. Compartment A/B in neo-Y regions.** **a** Proportion of  
 547 bins with switched compartment type between female and male *M. crinifrons* genome.  
 548 “A to B” indicate compartment switch from A in female *M. crinifrons* to compartment  
 549 B in male. “B to A” indicates opposite compartment switch. **b** Compartment A/B of  
 550 female and male *M. crinifrons*, and other genomic features in neo-Y regions.

551

552

553

554

555

556

557

558

559

560

561

562

563

564

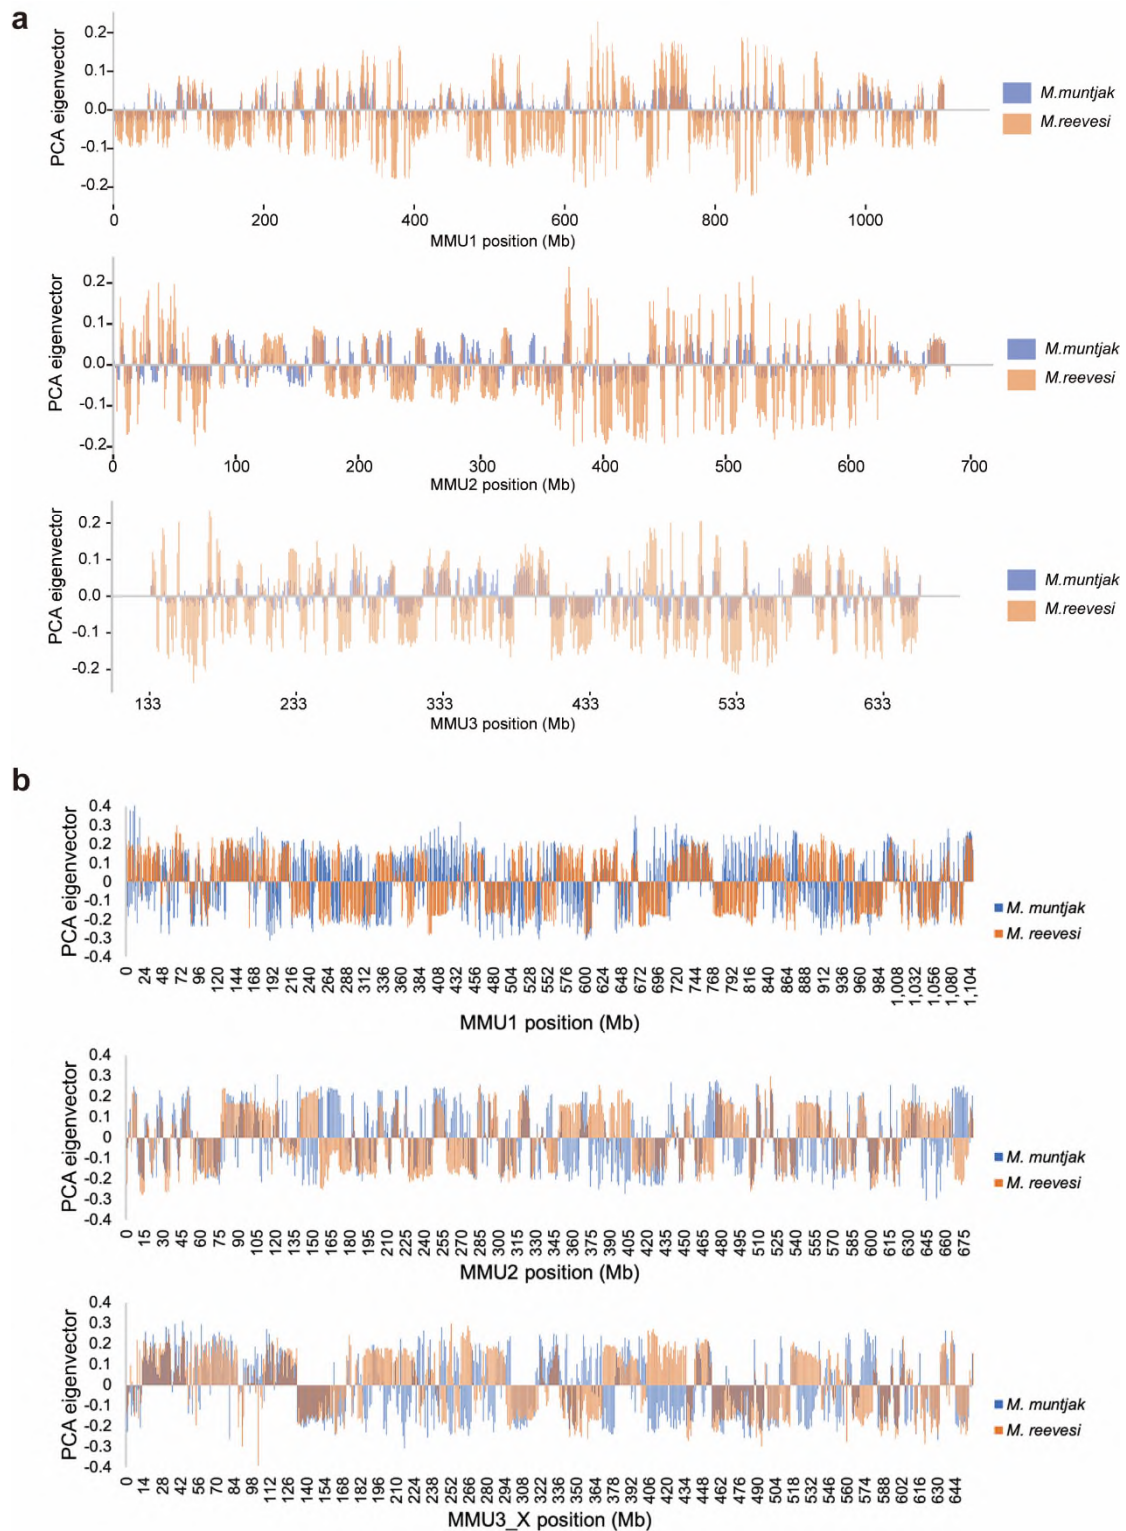

565

566 **Supplementary Figure 24. Comparison of compartment A/B results from**

567 **different methods. a** Compartment A/B of *M. muntjak vaginalis* and *M. reevesi*

568 identified by method we used in this study. The Hi-C data and genomes of *M. muntjak*

569 *vaginalis* and *M. reevesi* are all from Mudd et al.<sup>32</sup>. The Hi-C reads of *M. muntjak*

570 *vaginalis* and *M. reevesi* against their own reference genomes to identify their  
571 compartment A/B separately. The compartment results of *M. reevesi* was then  
572 assigned to the genome of *M. muntjak vaginalis* according their bins' homologous  
573 mapping relationship. Orange bars are compartment of *M. reevesi* and blue ones are  
574 *M. muntjak vaginalis*. Regions where orange and blue do not overlap can be  
575 considered as compartment switch between *M. reevesi* and *M. muntjak vaginalis*. Due  
576 to the low quality assembly of *M. reevesi*'s X chromosome, we just obtained three  
577 homologous bins between X chromosome of *M. reevesi* and X regions of *M. muntjak*  
578 *vaginalis*. The compartment of *M. reevesi* and *M. muntjak vaginalis* in X region could  
579 not be displayed comparatively. MMU, *M. muntjak vaginalis*; MRE, *M. reevesi*. **b**  
580 The graph showing compartment comparison between *M. reevesi* and *M. muntjak*  
581 *vaginalis* from the supplementary material of Mudd et al's study. In their study, the  
582 compartment of *M. reevesi* is identified by aligning *M. reevesi*'s Hi-C reads to *M.*  
583 *muntjak vaginalis* genome.

584

585

586

587

588

589

590

591

592

593

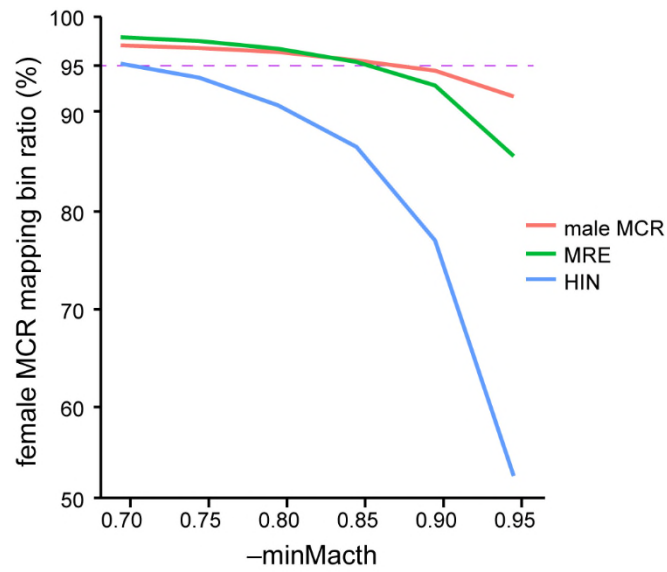

594

595 **Supplementary Figure 25. Ratios of female *M. crinifrons* bins mapped with**  
 596 **homologous bins in other three genomes.** The bins are at 40 kb resolution. The  
 597 horizontal ordinate is the parameter of liftover. MCR, *M. crinifrons*; MRE, *M. reevesi*;  
 598 HIN, *H. inermis*.

599

600

601

602

603

604

605

606

607

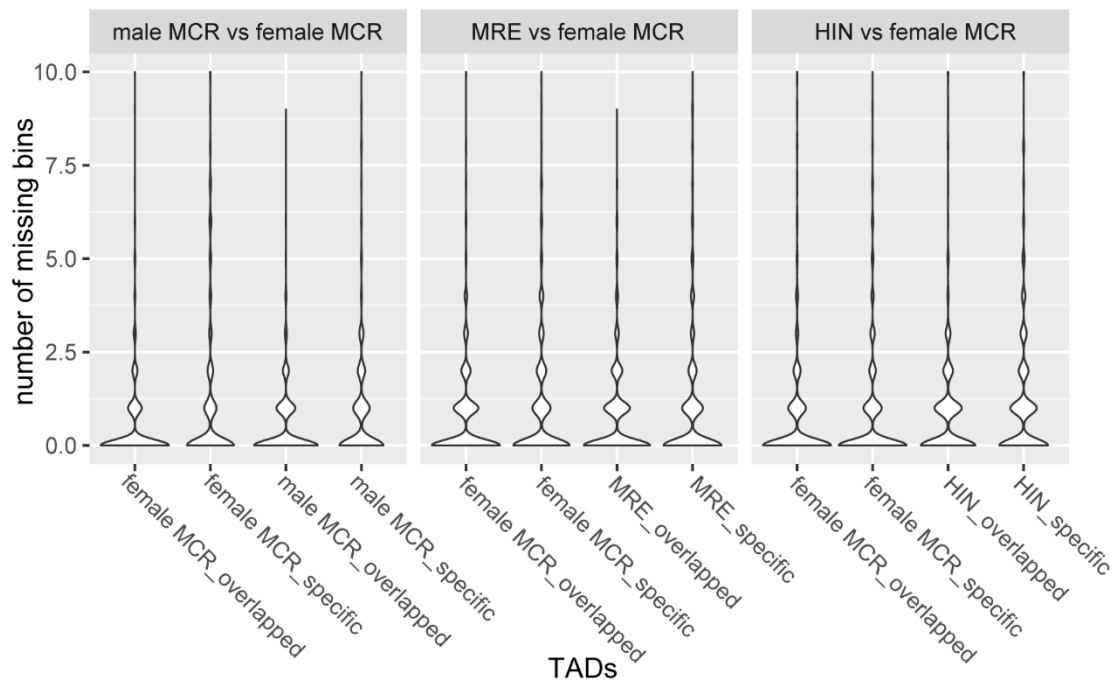

608

609 **Supplementary Figure 26. Number of missing bins in different type of TADs.**

610 “female MCR\_overlapped” means female *M. crinifrons* TADs that are homologous

611 with TADs in male *M. crinifrons*, *M. reevesi* (Chinese muntjac) or *H. inermis*

612 (Chinses water deer). “female MCR\_specific” means female *M. crinifrons* TADs that

613 are not homologous with TADs in male *M. crinifrons*, *M. reevesi* or *H. inermis*.

614 Similarly, “male MCR\_overlapped”, “MRE\_overlapped” and “HIN\_overlapped”

615 respectively represent TADs of male *M. crinifrons*, *M. reevesi*, and *H. inermis* that are

616 homologous with female *M. crinifrons*. “male MCR\_specific”, “MRE\_specific” and

617 “HIN\_specific” represent male *M. crinifrons*, *M. reevesi*, and *H. inermis* TADs that

618 are not homologous with female *M. crinifrons*.

619

620

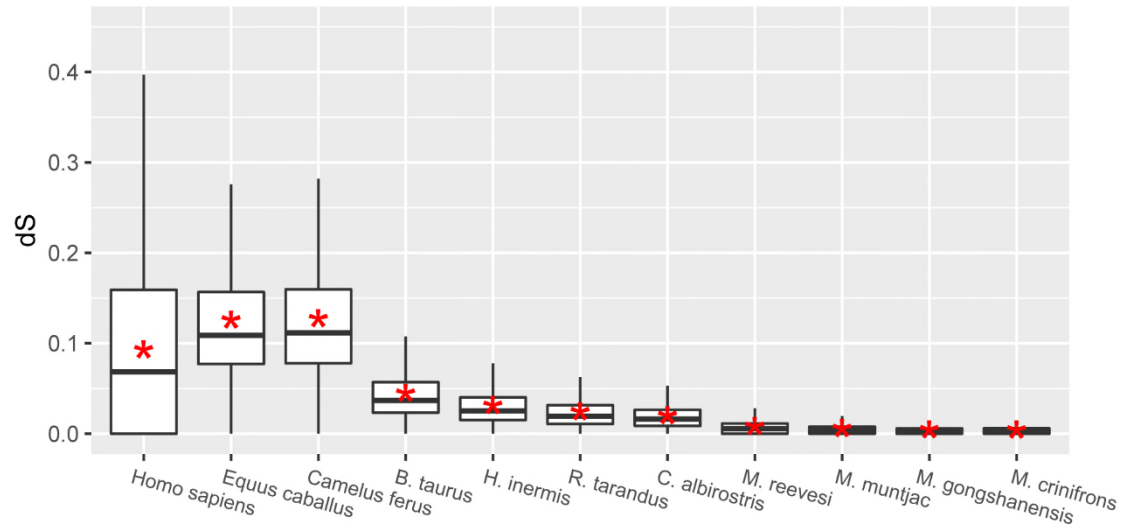

621

622 **Supplementary Figure 27. Synonymous substitution rate ( $dS$ ) of genes.** The  $dS$   
 623 values of 16,627 homologous genes were calculated using the free-ratio model of the  
 624 Codeml module in PAML software package (version 4.8)<sup>33</sup>. The lower and upper  
 625 hinges correspond to the first and third quartiles. The horizontal bold line inside the  
 626 box is the median. The upper whisker extends from the hinge to the largest value no  
 627 further than  $1.5 * IQR$  from the hinge (where  $IQR$  is distance between the first and  
 628 third quartiles). The lower whisker extends from the hinge to the smallest value at  
 629 most  $1.5 * IQR$  of the hinge. Outlier are not displayed. The red stars represent the  
 630 average value of  $dS$ .

631

632

633

634

635

636

637

638

639

640

641

642 **Supplementary Tables**643 **Supplementary Table 1. Information of samples.**

644 Species information, collection locations and sample types are listed here. All the  
 645 samples are collected in China. The number in sample id represent different  
 646 individuals.

| <b>Species</b>          | <b>Sample id</b> | <b>Sample gender</b> | <b>Collection locations</b>             | <b>Sample type</b> |
|-------------------------|------------------|----------------------|-----------------------------------------|--------------------|
| <i>H. inermis</i>       | HIN1             | Male                 | Jiangsu province                        | blood              |
| <i>M. reevesi</i>       | MER1             | Male                 | Hefei Wild-life Zoo                     | blood              |
| <i>M. gongshanensis</i> | MGO1             | Female               | Kunming Cell Bank                       | frozen tissue      |
|                         | MGO2             | Unknown              | Kunming Cell Bank                       | frozen tissue      |
| <i>M. crinifrons</i>    | female MCR1      | Female               | Hefei Wild-life Zoo                     | blood              |
|                         | female MCR2      | Female               | Hefei Wild-life Zoo                     | blood              |
|                         | female MCR3      | Female               | Kunming Cell Bank                       | frozen tissue      |
|                         | female MCR4      | Female               | Kunming Cell Bank                       | cell line          |
|                         | male MCR1        | Male                 | Hefei Wild-life Zoo                     | blood              |
|                         | male MCR2        | Male                 | Hefei Wild-life Zoo                     | blood              |
|                         | male MCR3        | Male                 | Kunming Cell Bank                       | frozen tissue      |
|                         | male MCR4        | Male                 | Kunming Cell Bank                       | cell line          |
| <i>E. davidianus</i>    | EDA1             | Male                 | Beijing Milu Ecological Research Center | blood              |

647

648

649

650

651



652 **Supplementary Table 2. Summary of Nanopore sequencing results.**

653 Reads number, reads N50 length, amounts and coverage of clean data of samples

654 sequenced by Nanopore technology.

| <b>Species</b>          | <b>Sample<br/>id</b> | <b>Reads<br/>number</b> | <b>Reads<br/>N50 (kb)</b> | <b>Clean<br/>data (Gb)</b> | <b>Coverage<br/>(×)</b> |
|-------------------------|----------------------|-------------------------|---------------------------|----------------------------|-------------------------|
| <i>M. crinifrons</i>    | Female<br>MCR 1      | 12,165,895              | 34.9                      | 305.2                      | 122                     |
| <i>M. reevesi</i>       | MER1                 | 6,841,035               | 38.1                      | 190.4                      | 76                      |
| <i>M. gongshanensis</i> | MGO1                 | 10,322,205              | 26.2                      | 186.5                      | 75                      |
| <i>E. davidianus</i>    | EDA1                 | 2,576,866               | 33.8                      | 62.1                       | 25                      |

655

656

657

658

659

660

661

662

663

664

665

666

667

668

669

670

671

672

673 **Supplementary Table 3. Summary of next-generation sequencing (NGS) results.**

674 Amounts and coverage of clean data for samples sequenced by next-generation

675 sequencing (Illumina) technology.

| <b>Species</b>          | <b>Sample id</b> | <b>Clean data (Gb)</b> | <b>Coverage (X)</b> |
|-------------------------|------------------|------------------------|---------------------|
| <i>M. crinifrons</i>    | Female MCR1      | 152.0                  | 62                  |
|                         | Female MCR2      | 154.7                  | 62                  |
|                         | Female MCR3      | 110.3                  | 44                  |
|                         | Male MCR2        | 164.6                  | 62                  |
|                         | Male MCR3        | 106.9                  | 40                  |
| <i>M. reevesi</i>       | MRE1             | 127.0                  | 52                  |
| <i>M. gongshanensis</i> | MGO1             | 122.0                  | 49                  |
|                         | MGO2             | 131.3                  | 53                  |

676

677

678

679

680

681

682

683

684

685

686

687

688

689

690

691

692 **Supplementary Table 4. Summary of Hi-C sequencing results.**

693 Amounts and coverage of clean data of Hi-C sequencing. Partial (52~72 ×) Hi-C

694 data were used for chromosome assembly.

| Species              | Sample<br>id   | Total data |          |               | Data for<br>chromosome<br>assembly |          |
|----------------------|----------------|------------|----------|---------------|------------------------------------|----------|
|                      |                | Base       | Coverage | Reads pair    | Base                               | Coverage |
|                      |                | (Gb)       | (×)      |               | (Gb)                               | (×)      |
| <i>M. crinifrons</i> | Female<br>MCR1 | 663.0      | 266      | 2,246,086,718 | 174.01                             | 71       |
|                      | Male<br>MCR1   | 797.0      | 300      | 2,700,196,562 | 127.40                             | 52       |
| <i>M. reevesi</i>    | MRE1           | 818.6      | 328      | 2,778,092,796 | 137.76                             | 56       |
| <i>H. inermis</i>    | HIN1           | 669.5      | 264      | 3,353,304,975 | 179.73                             | 72       |

695

696

697

698

699

700

701

702

703

704

705

706

707

708

709 **Supplementary Table 5. Genome assembly statistics.**

710 The draft genomes of female *M. crinifrons* (MCR), *M. reevesi* (MRE) and *M.*  
 711 *gongshanensis* (MGO) were assembled using newly obtained nanopore reads in this  
 712 study and that of male *M. crinifrons* were reassembled using the downloaded PacBio  
 713 reads (PRJNA438286) from <sup>6</sup>. The draft genome of *H. inermis* (HIN) assembled using  
 714 10X genomics data is from the study by Wang et al. <sup>34</sup>. “Mounting ratio” means the  
 715 percentage of contig sequence anchored on chromosomes. Completeness of  
 716 chromosome or contig assembly are assessed by BUSCO based on the  
 717 mammalia\_odb9 set <sup>26</sup>.

| <b>Genomes</b>            | <b>Female</b> | <b>Male</b> | <b>MGO</b> | <b>MRE</b> | <b>HIN</b> |
|---------------------------|---------------|-------------|------------|------------|------------|
|                           | <b>MCR</b>    | <b>MCR</b>  |            |            |            |
| <b>Contig N50 (Mb)</b>    | 37.86         | 3.79        | 24.47      | 33.32      | -          |
| <b>Num. of contigs</b>    | 265           | 20,390      | 314        | 299        | -          |
| <b>Genome size (Gb)</b>   | 2.489         | 2.658       | 2.475      | 2.493      | 2.530      |
| <b>Scaffold N50 (Mb)</b>  | 646.57        | 535.59      | -          | 113.32     | 74.97      |
| <b>Num. of chr.</b>       | 4             | 5           | -          | 23         | 35         |
| <b>Mounting ratio (%)</b> | 98.82         | 91.49       | -          | 98.62      | 97.57      |
| <b>Busco (%)</b>          | 95.2          | 94.9        | -          | 95.2       | 94.9       |

718  
 719  
 720  
 721  
 722  
 723  
 724  
 725  
 726  
 727

728 **Supplementary Table 6.** Mutation rate and generation time. The mutation rate was  
729 calculated using r8s based on the phylogenetic tree with calibrated divergence time.  
730 Generation time of the species used in PSMC analysis are listed here. The generation  
731 time of *H. inermis* and *C. albirostris* are referenced from Chen et al. <sup>6</sup> and that of the  
732 four muntjac species are referenced from Di Marco et al. <sup>35</sup>.

| Species                     | Mutation rate | Generation time |
|-----------------------------|---------------|-----------------|
| <i>B. taurus</i>            | 1.7406e-09    | -               |
| <i>R. tarandus</i>          | 2.5032e-09    | -               |
| <i>H. inermis</i>           | 3.2651e-09    | 5               |
| <i>E. davidianus</i>        | 2.2076e-09    | -               |
| <i>C. albirostris</i>       | 2.0384e-09    | 5               |
| <i>M. reevesi</i>           | 2.3796e-09    | 2.5             |
| <i>M. gongshanensis</i>     | 2.4537e-09    | 2.5             |
| <i>M. crinifrons</i>        | 2.4796e-09    | 2.5             |
| <i>M. muntjak vaginalis</i> | 2.4365e-09    | 2.5             |

733  
734  
735  
736  
737  
738  
739  
740  
741  
742  
743  
744  
745

746 **Supplementary Table 7. Fusion events identified in female *M. crinifrons* genome.**

747 The fusion events in female *M. crinifrons* genome is inferred from the chromosome  
748 alignment of female *M. crinifrons* with *B. taurus*, *H. inermis* and *M. reevesi*. Each  
749 fusion event on each chromosome of female *M. crinifrons* are marked by the ancestral  
750 chromosome represented by chromosome or chromosome segments of *B. taurus*, *H.*  
751 *inermis* and *M. reevesi* which directly fused in female *M. crinifrons*. The “Left” and  
752 “Right” respectively label chromosomes directly involved in each fusion event. The  
753 “Type” column indicates the type of fusion event, including tandem fusion (T) and  
754 Robertsonian fusion (R). The “Class” column indicates that the sharing of fusion events  
755 by various muntjac species, which is deduced from the previous cytological results <sup>36-</sup>  
756 <sup>38</sup> and our chromosome synteny results. C\_N indicates that fusion events which shared  
757 by N muntjac species. Shared by fewer species, the younger the fusion event.

| Chr. of female | BTA |      | HIN   |      | MRE   |      | Type | Class |
|----------------|-----|------|-------|------|-------|------|------|-------|
|                | MCR | Left | Right | Left | Right | Left |      |       |
| 1              | 19  | 10   | 18    | 5    | 17    | 8    | T    | C_1   |
| 1              | 10  | 1    | 5     | 27   | 8     | 18   | R    | C_1   |
| 1              | 1   | 29   | 27    | 29   | 18    | 5a   | T    | C_3   |
| 1              | 29  | 8    | 29    | 17   | 5a    | 19   | T    | C_4   |
| 1              | 8   | 12   | 17    | 8    | 19    | 9    | T    | C_2   |
| 1              | 12  | 6    | 8     | 19   | 9     | 16   | T    | C_4   |
| 1              | 6   | 6    | 19    | 30   | 16    | 21   | T    | C_4   |
| 1              | 6   | 4    | 30    | 2    | 21    | 6    | T    | C_3   |
| 1              | 4   | 16   | 2     | 12   | 6     | 5b   | T    | C_4   |
| 2              | 18  | 25   | 20    | 33   | 2d    | 2c   | T    | C_5   |
| 2              | 25  | 26   | 33    | 7    | 2c    | 2b   | T    | C_5   |
| 2              | 28  | 9    | 7     | 22   | 2b    | 14   | T    | C_4   |
| 2              | 9   | 20   | 22    | 15   | 14    | 13   | T    | C_4   |
| 2              | 20  | 21   | 15    | 16   | 13    | 15   | T    | C_4   |
| 2              | 21  | 27   | 16    | 32   | 15    | 11b  | T    | C_4   |
| 2              | 27  | 8    | 32    | 31   | 11b   | 11a  | T    | C_5   |
| 2              | 8   | 15   | 31    | 11   | 11a   | 10   | T    | C_3   |
| 2              | 15  | 1    | 11    | 6    | 10    | 7    | R    | C_1   |
| 3              | 13  | 17   | 9     | 14   | 2a    | 20   | T    | C_3   |
| 3              | 17  | 22   | 14    | 21   | 20    | 4b   | T    | C_4   |

|   |    |    |    |    |    |    |   |     |
|---|----|----|----|----|----|----|---|-----|
| 3 | 22 | 5  | 21 | 26 | 4b | 4c | T | C_5 |
| 3 | 5  | 3  | 26 | 1  | 4c | 1b | T | C_4 |
| 3 | 3  | 7  | 1  | 3  | 1b | 1c | T | C_5 |
| 4 | 11 | 2  | 4  | 25 | 3d | 3c | T | C_5 |
| 4 | 2  | 14 | 25 | 10 | 3c | 12 | T | C_4 |
| 4 | 14 | 23 | 10 | 28 | 12 | 22 | T | C_4 |
| 4 | 23 | 24 | 28 | 23 | 22 | 4a | T | C_4 |
| 4 | 24 | 2  | 23 | 13 | 4a | 3a | T | C_3 |
| 4 | 2  | 5  | 13 | 24 | 3a | 1a | T | C_3 |
| 4 | 5  | 9  | 24 | 34 | 1a | 3b | T | C_1 |
| 4 | 9  | X  | 34 | X  | 3b | X  | R | C_1 |

---

758

759

760

761

762

763

764

765

766

767

768

769

770

771

772

773

774

775

776

777

778

779 **Supplementary Table 8.** The statistics of genome alignment results. Total base  
780 means the smallest total chromosome length between genome pairs. Alignment ratio  
781 is the percentage of alignment length in total base. Sequence identity is the percentage  
782 of exact matched base in alignment length. Substitution rate is the number of  
783 substituted bases divided by two folds of divergence time.

|                          | female <i>M. crinifrons</i> |                   |                   | <i>C. hircus</i> |                 |
|--------------------------|-----------------------------|-------------------|-------------------|------------------|-----------------|
|                          | male <i>M. crinifrons</i>   | <i>M. reevesi</i> | <i>H. inermis</i> | <i>B. taurus</i> | <i>O. aries</i> |
| Total base               | 2,432,301,072               | 2,459,394,662     | 2,468,664,404     | 2,582,134,882    | 2,582,134,882   |
| Mapped base              | 2,392,894,791               | 2,391,481,492     | 2,279,835,188     | 2,111,717,083    | 2,423,998,847   |
| Mapped ratio             | 98.4%                       | 97.2%             | 92.3%             | 81.78%           | 93.88%          |
| Identical base           | 2,368,023,317               | 2,326,978,218     | 2,112,335,753     | 1,479,479,959    | 2,257,529,284   |
| Sequence Identity        | 98.9%                       | 97.3%             | 92.7%             | 70.06%           | 93.13%          |
| Substitution rate        | -                           | 4.4E-09           | 3.2E-09           | 10.6E-09         | 5.7E-09         |
| Divergence time<br>(Mya) | -                           | 3.05              | 11.33             | 14.1             | 6.0             |

784

785

786

787

788

789

790

791

792

793

794

795



796 **Supplementary Table 9.** Positions, length and gaps of 31 fusion sites in female *M.*  
797 *crinifrons*. The regions of fusion sites were inferred from the chromosome synteny  
798 between female *M. crinifrons* and *B. taurus* or *H. inermis*. In order to correspond  
799 fusion sites to fusion events, we also marked the ancestral chromosome fragments on  
800 both sides of fusion sites using the number of chromosome fragments of *M. reevesi*.  
801 C\_1 to C\_5 indicate fusion sites shared by one to five muntjac species, which can also  
802 reflect the time stage of fusion site formation. By checking the appearance of Ns and  
803 coverage of nanopore reads in fusion sites and their upstream and downstream 200 kb  
804 region, we inferred the number of assembly gaps remained in each fusion site.

| Chr | Start       | End         | Length  | Left Segment. | Right Segment. | Class | Num. of gaps |
|-----|-------------|-------------|---------|---------------|----------------|-------|--------------|
| 1   | 60,249,089  | 60,682,528  | 433,440 | 17            | 8              | C_5   | 1            |
| 1   | 154,881,321 | 155,184,370 | 303,050 | 8             | 18             | C_5   | 1            |
| 1   | 206,630,177 | 207,119,107 | 488,931 | 18            | 5a             | C_3   | 2            |
| 1   | 253,998,847 | 254,650,874 | 652,028 | 5a            | 19             | C_2   | 1            |
| 1   | 315,391,968 | 315,628,621 | 236,654 | 19            | 9              | C_4   | 2            |
| 1   | 397,714,843 | 397,805,646 | 90,804  | 9             | 16             | C_2   | 1            |
| 1   | 459,052,872 | 459,170,307 | 117,436 | 16            | 21             | C_2   | 1            |
| 1   | 506,410,362 | 506,496,327 | 85,966  | 21            | 6              | C_3   | 1            |
| 1   | 618,388,290 | 618,550,821 | 162,532 | 6             | 5b             | C_2   | 3            |
| 2   | 61,903,828  | 61,910,032  | 6,205   | 2d            | 2c             | C_1   | 0            |
| 2   | 102,662,795 | 102,752,384 | 89,590  | 2c            | 2b             | C_1   | 1            |
| 2   | 193,951,504 | 194,015,859 | 64,356  | 2b            | 14             | C_2   | 1            |
| 2   | 252,799,496 | 252,935,771 | 136,276 | 14            | 13             | C_2   | 1            |
| 2   | 320,075,527 | 320,279,220 | 203,694 | 13            | 15             | C_2   | 1            |
| 2   | 385,662,221 | 385,787,990 | 125,770 | 15            | 11b            | C_2   | 1            |
| 2   | 427,017,647 | 427,241,129 | 223,483 | 11b           | 11a            | C_1   | 2            |
| 2   | 470,398,810 | 470,568,565 | 169,756 | 11a           | 10             | C_3   | 1            |

|   |             |             |         |    |    |     |   |
|---|-------------|-------------|---------|----|----|-----|---|
| 2 | 547,839,849 | 548,127,395 | 287,547 | 10 | 7  | C_5 | 1 |
| 3 | 79,413,509  | 79,487,659  | 74,151  | 2a | 20 | C_3 | 1 |
| 3 | 148,345,652 | 148,346,381 | 730     | 20 | 4b | C_2 | 1 |
| 3 | 206,306,444 | 206,386,443 | 80,000  | 4b | 4c | C_1 | 1 |
| 3 | 259,039,164 | 259,053,513 | 14,350  | 4c | 1b | C_2 | 1 |
| 3 | 373,017,011 | 373,149,282 | 132,272 | 1b | 1c | C_1 | 1 |
| 4 | 101,146,058 | 101,649,364 | 503,307 | 3d | 3c | C_1 | 1 |
| 4 | 155,168,668 | 155,313,264 | 144,597 | 3c | 12 | C_2 | 1 |
| 4 | 232,690,291 | 232,843,171 | 152,881 | 12 | 22 | C_2 | 3 |
| 4 | 281,877,412 | 282,036,727 | 159,316 | 22 | 4a | C_2 | 1 |
| 4 | 339,822,999 | 339,997,157 | 174,159 | 4a | 3a | C_3 | 1 |
| 4 | 414,079,771 | 414,217,410 | 137,640 | 3a | 1a | C_3 | 1 |
| 4 | 471,938,315 | 472,086,989 | 148,675 | 1a | 3b | C_5 | 2 |
| 4 | 509,909,216 | 510,430,186 | 520,971 | 3b | X  | C_5 | 1 |

---

805  
806  
807  
808  
809  
810  
811  
812  
813  
814  
815  
816  
817  
818

819 **Supplementary Table 10.** Nanopore reads used to investigate molecular cause of  
820 chromosome fusions. Partial nanopore reads of female *M. crinifrons* (female MCR),  
821 *M. reevesi* (MRE), *M. gongshanensis* (MGO) and *E. davidianus* (EDA) were  
822 extracted. The number of reads and their total base are listed here. The content of  
823 satellite and telomeric sequence in these reads were obtained by aligning three types  
824 of Cervidae-specific satellite sequence and telomere of vertebrates to these reads. satI,  
825 satellite I; satII, satellite II; satIV, satellite IV.

| <b>Species</b>     |                  | <b>Female MCR</b> | <b>MGO</b>     | <b>MRE</b>     | <b>EDA</b>     |
|--------------------|------------------|-------------------|----------------|----------------|----------------|
| <b>Total reads</b> |                  | 1,669,306         | 2,000,000      | 1,696,620      | 2,576,866      |
| <b>Total bases</b> |                  | 44,051,645,020    | 40,591,609,554 | 46,742,883,242 | 62,037,303,795 |
| <b>SatI</b>        | <b>Bases</b>     | 351,913,255       | 417,925,797    | 198,999,611    | 2,907,788,968  |
|                    | <b>Ratio (%)</b> | 0.7981            | 1.0267         | 0.4207         | 4.6871         |
| <b>SatII</b>       | <b>Bases</b>     | 371,947,908       | 35,070,298     | 30,027,897     | 140,736,951    |
|                    | <b>Ratio (%)</b> | 0.8347            | 0.0834         | 0.0627         | 0.2268         |
| <b>SatIV</b>       | <b>Bases</b>     | 1,361,361         | 870,155        | 27,123,048     | 3,149,655      |
|                    | <b>Ratio (%)</b> | 0.0027            | 0.0016         | 0.0552         | 0.005          |
| <b>Telomere</b>    | <b>Bases</b>     | 974,183           | 769,197        | 3,948,520      | 6,464,670      |
|                    | <b>ratio (%)</b> | 0.0022            | 0.0019         | 0.0084         | 0.0104         |

826  
827  
828  
829  
830  
831  
832  
833  
834  
835  
836  
837  
838  
839

840 **Supplementary Table 11.** Number of reads with palindrome sequence at 4 kb  
841 upstream and downstream of the truncated short telomeric sequence. In some of the  
842 three types of reads containing satellite and short telomeric sequence, we searched for  
843 palindrome sequences in the region of 4 kb upstream and downstream of the short  
844 telomeric sequence. The total number of the three types of reads, the number and ratio  
845 of reads with palindrome sequences were listed here. satI, satellite I sequence; satIV,  
846 satellite IV sequence; telomere, telomeric sequence.

| Species       | Number of reads with palindrome |                    |                             | Total reads<br>with<br>palindrome | Total<br>reads | Ratio<br>(%) |
|---------------|---------------------------------|--------------------|-----------------------------|-----------------------------------|----------------|--------------|
|               | satI-<br>telomere<br>(>=500)    | satIV-<br>telomere | satI-<br>satIV-<br>telomere |                                   |                |              |
| Female<br>MCR | 38                              | 72                 | 450                         | 560                               | 606            | 92.41        |
| MGO           | 19                              | 62                 | 113                         | 194                               | 218            | 88.99        |
| MRE           | 187                             | 992                | 2888                        | 4067                              | 4582           | 88.76        |
| EDA           | 14                              | 160                | 277                         | 451                               | 452            | 99.78        |

847  
848  
849  
850  
851  
852  
853  
854  
855  
856  
857  
858

859 **Supplementary Table 12.** Number of nanopore reads with different repeat patterns.  
860 The nanopore reads aligned with satellite sequences or telomeric sequences were  
861 divided into different patterns based on whether they contain a certain satellite  
862 sequence or telomeric sequence. For the convenience of recording, we used a four-bit  
863 binary number to represent different patterns. From left to right, each bit represents  
864 satellite I, satellite II, satellite IV and telomeric sequence, respectively. When a read  
865 contains a certain type of satellite sequence or telomeric sequence, the corresponding  
866 position is set to 1, otherwise it is 0. For example, pattern 1011 indicates that this read  
867 synchronously contains satellite I, satellite IV and telomeric sequence. Then we  
868 counted the number of nanopore reads for each pattern. The proportions (0.01%) of  
869 reads with different patterns in the total investigated reads are also listed here. MGO,  
870 *M. gongshanensis*; MRC, *M. crinifrons*; MRE, *M. reevesi*; EDA, *E. davidianus*.

| patte<br>rn | Female MCR |                  | MGO        |                  | MRE        |                      | EDV        |                      |
|-------------|------------|------------------|------------|------------------|------------|----------------------|------------|----------------------|
|             | numbe<br>r | ratio<br>(0.01%) | numbe<br>r | ratio<br>(0.01%) | numbe<br>r | ratio<br>(0.01%<br>) | numbe<br>r | ratio<br>(0.01%<br>) |
| 0001        | 955        | 5.72             | 928        | 4.64             | 1093       | 6.44                 | 2610       | 10.13                |
| 0010        | 1487       | 8.91             | 1349       | 6.75             | 8438       | 49.73                | 3450       | 13.39                |
| 0100        | 133401     | 799.14           | 23143      | 115.72           | 14615      | 86.14                | 49555      | 192.31               |
| 0110        | 1164       | 6.97             | 76         | 0.38             | 877        | 5.17                 | 2742       | 10.64                |
| 1000        | 27086      | 162.26           | 46629      | 233.15           | 40300      | 237.53               | 230484     | 894.44               |
| 1010        | 1884       | 11.29            | 741        | 3.71             | 19039      | 112.22               | 1304       | 5.06                 |
| 1100        | 701        | 4.20             | 2991       | 14.96            | 22         | 0.13                 | 385        | 1.49                 |
| 1110        | 12         | 0.07             | 30         | 0.15             | 13         | 0.08                 | 16         | 0.06                 |
| 0011        | 75         | 0.45             | 67         | 0.34             | 1096       | 6.46                 | 160        | 0.62                 |
| 0101        | 27         | 0.16             | 16         | 0.08             | 181        | 1.07                 | 464        | 1.80                 |
| 0111        | 0          | 0.00             | 2          | 0.01             | 4          | 0.02                 | 3          | 0.01                 |
| 1001        | 162        | 0.97             | 120        | 0.60             | 294        | 1.73                 | 16         | 0.06                 |
| 1011        | 464        | 2.78             | 121        | 0.61             | 3218       | 18.97                | 277        | 1.07                 |
| 1101        | 0          | 0.00             | 1          | 0.01             | 0          | 0.00                 | 472        | 1.83                 |
| 1111        | 7          | 0.04             | 5          | 0.03             | 2          | 0.01                 | 21         | 0.08                 |

871

872

873

874 **Supplementary Table 13.** The statistics of genomic rearrangements. The genomes of  
875 *H. inermis* (HIN), *E. davidianus* (EDA) and four muntjac deer were firstly aligned to  
876 the genome of cattle, and then the genomic rearrangements (inter- and intra-  
877 chromosome translocations, and inversions) happened in these query genomes were  
878 inferred. MRE, *M. reevesi*; MCR, *M. crinifrons*; MGO; *M. gongshanensis*.

| Species    | Inter-<br>chr | Intra-<br>chr | Inversion | Total<br>rearrangement | Total aligned length | Rearrangement<br>per Mb |
|------------|---------------|---------------|-----------|------------------------|----------------------|-------------------------|
| MGO        | 727           | 225           | 10        | 962                    | 2471698130           | 3.89                    |
| female MCR | 518           | 236           | 18        | 772                    | 2460013611           | 3.14                    |
| male MCR   | 522           | 200           | 23        | 745                    | 2432301072           | 3.06                    |
| EDV        | 720           | 404           | 15        | 1139                   | 2500365215           | 4.56                    |
| MRE        | 533           | 222           | 9         | 764                    | 2459394662           | 3.11                    |
| HIN        | 663           | 237           | 54        | 954                    | 2468664404           | 3.86                    |

879

880

881

882

883

884

885

886

887

888

889

890

891

892

893

894 **Supplementary Table 14.** Genomic position of the neo-sex regions. According to  
895 chromosome collinearity among female *M. crinifrons*, male *M. crinifrons*, *M. reevesi*,  
896 *H. inermis* and *B. taurus* and the previous studies about neo-Y chromosome in BM<sup>36</sup>,  
897 we inferred the detailed genomic position of the neo-Y region in male *M. crinifrons*  
898 and its homologous regions (neo-X regions) in female *M. crinifrons*. The rest region  
899 except for the neo-Y region in the 1p+4 chromosome is regarded as “Other regions”.  
900 The ancestral chromosome segments were labeled according to the chromosomal  
901 regions of *M. reevesi*. The coordinates of the start and end positions and region length  
902 are in Mb.

| Regions | labels       | male <i>M. crinifrons</i> |        |        |        | female <i>M. crinifrons</i> |        |        |        |
|---------|--------------|---------------------------|--------|--------|--------|-----------------------------|--------|--------|--------|
|         |              | Chr                       | Start  | End    | Length | Chr                         | Start  | End    | Length |
| Other   | 3d+3c+12+22b | 1p+4                      | 0.00   | 267.12 | 267.12 | X+4                         | 0.00   | 267.49 | 267.49 |
| Neo-sex | 17a          | 1p+4                      | 267.12 | 308.50 | 41.38  | 1                           | 18.98  | 60.57  | 41.60  |
| Neo-sex | 3b           | 1p+4                      | 308.50 | 346.64 | 38.14  | X+4                         | 472.09 | 509.93 | 37.83  |
| Neo-sex | 8            | 1p+4                      | 346.64 | 438.09 | 91.45  | 1                           | 60.67  | 154.91 | 94.24  |
| Neo-sex | 22a+4a+3a+1a | 1p+4                      | 438.09 | 642.30 | 204.21 | X+4                         | 267.50 | 472.07 | 204.57 |
| Other   | 17b          | 1p+4                      | 642.30 | 661.25 | 18.95  | 1                           | 0.00   | 18.96  | 18.96  |

903  
904  
905  
906  
907  
908  
909  
910  
911  
912  
913

914 **Supplementary Table 15.** Distribution of candidate male-specific mutations  
 915 annotated as “MODERATE”. We counted the number of “MODERATE” mutations in  
 916 different genomic regions, including neo-Y region and the rest other regions. The total  
 917 length of coding sequence (cds) of all genes in each region was also calculated.  
 918 Within each 1 kb, the number of "MODERATE" mutations is shown here.

| <b>Region</b> | <b>Mutation number</b> | <b>Cds total length</b> | <b>Count/kb</b> |
|---------------|------------------------|-------------------------|-----------------|
| Neo-Y regions | 1589                   | 5,707,376               | 0.278           |
| Other regions | 687                    | 28,476,382              | 0.024           |

919  
 920  
 921  
 922  
 923  
 924  
 925  
 926  
 927  
 928  
 929  
 930  
 931  
 932  
 933  
 934  
 935  
 936  
 937



938 **Supplementary Table 16.** Comparison of topologically associating domain (TAD)  
939 between female and male *M. crinifrons*. The number of total TADs, altered TADs and  
940 conserved TADs between female and male *M. crinifrons* in the neo-Y region and all  
941 other genomic regions are listed here.

| <b>Region</b> | <b>Num. of altered TADs</b> | <b>Num. of conservative TADs</b> | <b>Total TADs</b> |
|---------------|-----------------------------|----------------------------------|-------------------|
| Neo-Y region  | 103                         | 311                              | 414               |
| Other regions | 571                         | 1467                             | 2038              |
| Total         | 674                         | 1778                             | 2452              |

942  
943  
944  
945  
946  
947  
948  
949  
950  
951  
952  
953  
954  
955  
956  
957  
958

959 **Supplementary Table 17.** Statistic of the Hi-C reads alignment results. The Hi-C  
960 reads and genomes of *M. muntjak vaginalis* and *M. reevesi* sequenced and assembled  
961 by Mudd et al. <sup>32</sup> were downloaded from NCBI (PRJNA542135 and PRJNA542137).  
962 The Hi-C reads of *M. muntjak vaginalis* were aligned to *M. muntjak vaginalis* itself  
963 genome, while that of *M. reevesi* were aligned to the *M. muntjak vaginalis* genome  
964 like Mudd et al. as well aligned to *M. reevesi* genome using the HiC-Pro pipeline <sup>39</sup>.

| Alignments results            | MMU to MMU   |             | MRE to MMU   |             | MRE to MRE   |             |
|-------------------------------|--------------|-------------|--------------|-------------|--------------|-------------|
|                               | Reads number | Reads ratio | Reads number | Reads ratio | Reads number | Reads ratio |
| Total pairs                   | 260874784    | 100         | 265001043    | 100         | 265001043    | 100         |
| Unmapped pairs                | 20348755     | 7.774       | 37892491     | 14.227      | 27222433     | 10.197      |
| Low qual pairs                | 36456945     | 13.854      | 82360963     | 31.099      | 40440626     | 15.143      |
| Unique paired alignments      | 177526233    | 68.281      | 70227680     | 26.636      | 156081943    | 59.373      |
| Multiple pairs alignments     | 0            | 0           | 0            | 0           | 0            | 0           |
| Pairs with singleton          | 26542851     | 10.09       | 74519909     | 28.038      | 41256041     | 15.288      |
| Low qual singleton            | 0            | 0           | 0            | 0           | 0            | 0           |
| Unique singleton alignments   | 0            | 0           | 0            | 0           | 0            | 0           |
| Multiple singleton alignments | 0            | 0           | 0            | 0           | 0            | 0           |
| Reported pairs                | 177526233    | 68.281      | 70227680     | 26.636      | 156081943    | 59.373      |

965

966

967

968

969

970

971

972

973

974

975

976

977

978

979 **Supplementary Table 18.** Number of PSGs and REGs under different filtering  
 980 criterion. The  $p$ -values are from one-sided chi-square test ( $p$ -value  $<0.05$ ) and the  $fdr$   
 981 value are adjusted  $p$ -value using “ $fdr$ ” method ( $FDR < 0.05$ ). “MCR\_MGO\_MMU”  
 982 indicate that the PSGs and the REGs are identified at the common ancestor of *M.*  
 983 *crinifrons* (MCR), *M. gongshanensis* (MGO) and *M. muntjak vaginalis* (MMU).  
 984

| Lineages    | $p$ -value $<0.05$ |      | FDR $<0.05$ |      |
|-------------|--------------------|------|-------------|------|
|             | PSGs               | REGs | PSGs        | REGs |
| MCR_MGO_MMU | 32                 | 210  | 1           | 9    |
| MCR         | 72                 | 509  | 6           | 17   |
| MGO         | 70                 | 582  | 8           | 21   |
| MMU         | 131                | 611  | 18          | 38   |

985  
 986  
 987  
 988  
 989  
 990  
 991  
 992  
 993  
 994  
 995  
 996  
 997  
 998  
 999  
 1000

- 1002 1. Liu, H., Wu, S., Li, A. & Ruan, J. SMARTdenovo: A de novo Assembler Using  
1003 Long Noisy Reads. *Preprints 2020* **2020090207**.
- 1004 2. Hu, J., Fan, J., Sun, Z. & Liu, S. NextPolish: a fast and efficient genome polishing  
1005 tool for long-read assembly. *Bioinformatics* **36**, 2253-2255, (2020).
- 1006 3. Vaser, R., Sovic, I., Nagarajan, N. & Sikic, M. Fast and accurate de novo genome  
1007 assembly from long uncorrected reads. *Genome Res* **27**, 737-746, (2017).
- 1008 4. Walker, B. J. *et al.* Pilon: an integrated tool for comprehensive microbial variant  
1009 detection and genome assembly improvement. *PLoS One* **9**, e112963, (2014).
- 1010 5. Ruan, J. & Li, H. Fast and accurate long-read assembly with wtdbg2. *Nature*  
1011 *Methods*, (2019).
- 1012 6. Chen, L. *et al.* Large-scale ruminant genome sequencing provides insights into their  
1013 evolution and distinct traits. *Science* **364**, (2019).
- 1014 7. Durand, N. C. *et al.* Juicer Provides a One-Click System for Analyzing Loop-  
1015 Resolution Hi-C Experiments. *Cell Syst* **3**, 95-98, (2016).
- 1016 8. Dudchenko, O. *et al.* De novo assembly of the *Aedes aegypti* genome using Hi-C  
1017 yields chromosome-length scaffolds. *Science* **356**, 92-95, (2017).
- 1018 9. Durand, N. C. *et al.* Juicebox Provides a Visualization System for Hi-C Contact  
1019 Maps with Unlimited Zoom. *Cell Syst* **3**, 99-101, (2016).
- 1020 10. Kielbasa, S. M., Wan, R., Sato, K., Horton, P. & Frith, M. C. Adaptive seeds tame  
1021 genomic sequence comparison. *Genome Res* **21**, 487-493, (2011).
- 1022 11. Krzywinski, M. *et al.* Circos: an information aesthetic for comparative genomics.  
1023 *Genome Res* **19**, 1639-1645, (2009).
- 1024 12. Benson, G. Tandem repeats finder: a program to analyze DNA sequences. *Nucleic*  
1025 *Acids Res* **27**, 573-580, (1999).
- 1026 13. Xu, Z. & Wang, H. LTR\_FINDER: an efficient tool for the prediction of full-  
1027 length LTR retrotransposons. *Nucleic Acids Res* **35**, W265-268, (2007).
- 1028 14. Smit, A., Hubley, R. & Green, P. RepeatMasker Open-4.0. (2013-2015).
- 1029 15. Bao, W., Kojima, K. K. & Kohany, O. Repbase Update, a database of repetitive  
1030 elements in eukaryotic genomes. *Mob DNA* **6**, 11, (2015).
- 1031 16. Korf, I. Gene finding in novel genomes. *BMC Bioinformatics* **5**, 59, (2004).
- 1032 17. Burge, C. & Karlin, S. Prediction of complete gene structures in human genomic  
1033 DNA. *J Mol Biol* **268**, 78-94, (1997).
- 1034 18. Majoros, W. H., Pertea, M. & Salzberg, S. L. TigrScan and GlimmerHMM: two  
1035 open source ab initio eukaryotic gene-finders. *Bioinformatics* **20**, 2878-2879, (2004).
- 1036 19. Stanke, M. *et al.* AUGUSTUS: ab initio prediction of alternative transcripts.  
1037 *Nucleic Acids Res* **34**, W435-439, (2006).
- 1038 20. Pennisi, E. The Human Genome. *Science* **291**, 1177-1180, (2001).
- 1039 21. Zimin, A. V. *et al.* A whole-genome assembly of the domestic cow, *Bos taurus*.  
1040 *Genome biology* **10**, R42, (2009).
- 1041 22. Altschul, S. F. *et al.* Gapped BLAST and PSI-BLAST: a new generation of protein  
1042 database search programs. *Nucleic Acids Res* **25**, 3389-3402, (1997).
- 1043 23. She, R., Chu, J. S., Wang, K., Pei, J. & Chen, N. GenBlastA: enabling BLAST to  
1044 identify homologous gene sequences. *Genome Res* **19**, 143-149, (2009).
- 1045 24. Birney, E., Clamp, M. & Durbin, R. GeneWise and Genomewise. *Genome Res* **14**,  
1046 988-995, (2004).
- 1047 25. Haas, B. J. *et al.* Automated eukaryotic gene structure annotation using  
1048 EvidenceModeler and the program to assemble spliced alignments. *Genome biology*  
1049 **9**, (2008).
- 1050 26. Simao, F. A., Waterhouse, R. M., Ioannidis, P., Kriventseva, E. V. & Zdobnov, E.  
1051 M. BUSCO: assessing genome assembly and annotation completeness with single-  
1052 copy orthologs. *Bioinformatics* **31**, 3210-3212, (2015).
- 1053 27. Camacho, C. *et al.* BLAST+: architecture and applications. *BMC Bioinformatics*  
1054 **10**, 421, (2009).
- 1055 28. Li, H. & Durbin, R. Fast and accurate short read alignment with Burrows-Wheeler  
1056 transform. *Bioinformatics* **25**, 1754-1760, (2009).
- 1057 29. Li, H. *et al.* The Sequence Alignment/Map format and SAMtools. *Bioinformatics*

1058 **25**, 2078-2079, (2009).  
1059 30. Thorvaldsdottir, H., Robinson, J. T. & Mesirov, J. P. Integrative Genomics Viewer  
1060 (IGV): high-performance genomics data visualization and exploration. *Brief*  
1061 *Bioinform* **14**, 178-192, (2013).  
1062 31. Liu, Y., Nie, W., Huang, L., Wang, J. & Wei-Ting, S. Cloning, characterization,  
1063 and FISH mapping of four satellite DNAs from black muntjac (*M. crinifrons*) and  
1064 Fea's muntjac (*M. feae*) *Zoological Research* **29**, 225-235, (2008).  
1065 32. Mudd, A. B., Bredeson, J. V., Baum, R., Hockemeyer, D. & Rokhsar, D. S.  
1066 Analysis of muntjac deer genome and chromatin architecture reveals rapid karyotype  
1067 evolution. *Commun Biol* **3**, 480, (2020).  
1068 33. Yang, Z. PAML 4: phylogenetic analysis by maximum likelihood. *Mol Biol Evol*  
1069 **24**, 1586-1591, (2007).  
1070 34. Wang, Y. *et al.* Genetic basis of ruminant headgear and rapid antler regeneration.  
1071 *Science* **364**, (2019).  
1072 35. Di Marco, M. *et al.* Generation length for mammals. *Nature Conservation* **5**, 89-  
1073 94, (2013).  
1074 36. Huang, L. *et al.* High-density comparative BAC mapping in the black muntjac  
1075 (*Muntiacus crinifrons*): molecular cytogenetic dissection of the origin of MCR 1p+4  
1076 in the X1X2Y1Y2Y3 sex chromosome system. *Genomics* **87**, 608-615, (2006).  
1077 37. Chi, J. X. *et al.* Defining the orientation of the tandem fusions that occurred  
1078 during the evolution of Indian muntjac chromosomes by BAC mapping. *Chromosoma*  
1079 **114**, 167-172, (2005).  
1080 38. Huang, L., Wang, J., Nie, W., Su, W. & Yang, F. Tandem chromosome fusions in  
1081 karyotypic evolution of *Muntiacus*: evidence from *M. feae* and *M. gongshanensis*.  
1082 *Chromosome research : an international journal on the molecular, supramolecular*  
1083 *and evolutionary aspects of chromosome biology* **14**, 637-647, (2006).  
1084 39. Servant, N. *et al.* HiC-Pro: an optimized and flexible pipeline for Hi-C data  
1085 processing. *Genome biology* **16**, 259, (2015).  
1086
